# Supplementary material for: Differential Evolution with Novel Mutation and Adaptive Crossover Strategies for Solving Large Scale Global Optimization Problems
Source: Hindawi journal article supplement (doi:10.1155/2017/7974218), 2017-01-01
Supplement: f1 [file 7974218.f1.docx]

**Supplemental File**

**Table Captions**

- **Table S1** Experimental Comparisons between ANDE, ANDE-1 and ANDE-2 algorithms, FES= 1.2E+05.
- **Table S2** Experimental Comparisons between ANDE, ANDE-1 and ANDE-2 algorithms, FES= 6.0E+05.
- **Table S3** Experimental Comparisons between ANDE, ANDE-1 and ANDE-2 algorithms, FES= 3.0E+06.
- **Table S4** Experimental Comparisons between ANDE, ANDE-1 and ANDE-2 and state-of-the-art algorithms, FES= 1.20E+05.
- **Table S5** Experimental Comparisons between ANDE, ANDE-1 and ANDE-2 and state-of-the-art algorithms, FES= 6.00E+05.
- **Table S6** Experimental Comparisons between ANDE, ANDE-1 and ANDE-2 and state-of-the-art algorithms, FES= 3.00E+05.
- **Table S7** Experimental Comparisons between ANDE, ANDE*CR*=0.1, ANDE*CR*=0.5 and ANDE*CR*=0.9 algorithms, FES= 6.0E5.
- **Table S8** Experimental Comparisons between ANDE, ANDELP=5% ANDELP=20% algorithms, FES= 6.00E+05.
- **Table S9** Experimental Comparisons between ANDE, ANDEMFC=0 , ANDEMFC=10 and ANDEMFC=30 algorithms, FES= 6.0E5.

**Figure Captions**

- **Fig. S1.** Convergence graph (median curves) of ANDE, ANDE-1 and ANDE-2 on 1000-dimensional test functions.
- **Fig. S2 .**Convergence graph (median curves) of ANDE, ANDE-1 and ANDE-2 on test functionF6

**Table S1** Experimental Comparisons between ANDE, ANDE-1 and ANDE-2 algorithms, FES= 1.20E+05

|  |  | F1 | F2 | F3 | F4 | F5 | F6 | F7 |
| --- | --- | --- | --- | --- | --- | --- | --- | --- |
| ANDE-1 | Best | 2.78E+08 | 9.33E+03 | 1.23E+01 | 7.55E+12 | 7.67E+07 | 2.08E+01 | 1.22E+09 |
| Median | 3.32E+08 | 9.53E+03 | 1.26E+01 | 1.40E+13 | 2.85E+08 | 2.21E+01 | **2.02E+09** |
| Worst | 3.86E+08 | 9.80E+03 | 1.29E+01 | 1.82E+13 | 3.23E+08 | 2.34E+01 | 3.26E+09 |
| Mean | 3.32E+08 | 9.53E+03 | 1.26E+01 | **1.34E+13** | 2.58E+08 | 2.19E+01 | **2.09E+09** |
| Std | 2.55E+07 | 1.17E+02 | 1.90E-01 | 3.35E+12 | 7.74E+07 | 9.38E-01 | 6.22E+08 |
| ANDE | Best | 2.48E+08 | 8.52E+03 | 1.14E+01 | 5.38E+12 | 9.43E+07 | 2.00E+01 | 1.48E+09 |
| Median | 2.67E+08 | 8.65E+03 | 1.18E+01 | **1.38E+13** | 2.39E+08 | **2.05E+01** | 3.02E+09 |
| Worst | 2.92E+08 | 8.92E+03 | 1.20E+01 | 2.67E+13 | 2.90E+08 | 2.20E+01 | 4.63E+09 |
| Mean | 2.66E+08 | 8.67E+03 | 1.18E+01 | 1.51E+13 | 2.20E+08 | **2.08E+01** | 3.05E+09 |
| Std | 1.33E+07 | 9.36E+01 | 1.45E-01 | 5.61E+12 | 6.28E+07 | 7.02E-01 | 8.06E+08 |
| ANDE-2 | Best | 1.22E+08 | 7.53E+03 | 1.07E+01 | 1.10E+13 | 9.37E+07 | 2.00E+01 | 2.61E+09 |
| Median | **1.30E+08** | **7.68E+03** | **1.08E+01** | 1.56E+13 | **1.98E+08** | 2.05E+01 | 4.86E+09 |
| Worst | 1.43E+08 | 7.89E+03 | 1.12E+01 | 2.54E+13 | 3.25E+08 | 2.19E+01 | 6.19E+09 |
| Mean | **1.31E+08** | **7.71E+03** | **1.09E+01** | 1.72E+13 | **2.04E+08** | 2.09E+01 | 4.58E+09 |
| Std | 6.54E+06 | 1.06E+02 | 1.53E-01 | 4.01E+12 | 7.16E+07 | 7.32E-01 | 1.01E+09 |
|  |  | F8 | F9 | F10 | F11 | F12 | F13 | F14 |
| ANDE-1 | Best | 3.81E+07 | 2.35E+09 | 8.16E+03 | 1.37E+02 | 1.79E+06 | 1.81E+08 | 4.80E+09 |
| Median | **4.68E+07** | 2.83E+09 | 9.93E+03 | 1.66E+02 | **2.04E+06** | 3.13E+08 | 5.30E+09 |
| Worst | 1.11E+08 | 3.15E+09 | 1.32E+04 | 1.84E+02 | 2.19E+06 | 5.03E+08 | 5.88E+09 |
| Mean | **5.42E+07** | 2.82E+09 | 1.03E+04 | 1.63E+02 | **2.02E+06** | 3.06E+08 | 5.29E+09 |
| Std | 2.15E+07 | 2.16E+08 | 1.78E+03 | 1.30E+01 | 1.00E+05 | 9.63E+07 | 3.02E+08 |
| ANDE | Best | 4.47E+07 | 2.35E+09 | 1.00E+04 | 1.06E+02 | 1.96E+06 | 6.56E+07 | 4.50E+09 |
| Median | 1.06E+08 | **2.80E+09** | **1.21E+04** | 1.29E+02 | 2.24E+06 | 1.10E+08 | **5.12E+09** |
| Worst | 1.62E+08 | 3.22E+09 | 1.32E+04 | 1.65E+02 | 2.39E+06 | 1.34E+08 | 5.47E+09 |
| Mean | 9.13E+07 | **2.79E+09** | **1.20E+04** | 1.33E+02 | 2.21E+06 | **1.06E+08** | **5.04E+09** |
| Std | 3.58E+07 | 2.58E+08 | 9.75E+02 | 1.87E+01 | 1.15E+05 | 1.98E+07 | 2.68E+08 |
| ANDE-2 | Best | 4.47E+07 | 3.97E+09 | 1.12E+04 | 7.88E+01 | 2.85E+06 | 4.26E+07 | 6.77E+09 |
| Median | 4.72E+07 | 4.50E+09 | **1.21E+04** | **1.10E+02** | 3.26E+06 | **1.07E+08** | 7.43E+09 |
| Worst | 1.33E+08 | 6.02E+09 | 1.28E+04 | 1.25E+02 | 4.31E+06 | 2.96E+08 | 8.93E+09 |
| Mean | 7.51E+07 | 4.70E+09 | **1.20E+04** | **1.05E+02** | 3.36E+06 | 1.27E+08 | 7.48E+09 |
| Std | 3.30E+07 | 5.91E+08 | 4.06E+02 | 1.60E+01 | 3.63E+05 | 7.74E+07 | 5.41E+08 |
|  |  | F15 | F16 | F17 | F18 | F19 | F20 |  |
| ANDE-1 | Best | 9.24E+03 | 3.79E+02 | 2.36E+06 | 3.30E+10 | 1.01E+07 | 4.14E+10 |  |
| Median | 1.35E+04 | 3.92E+02 | **2.46E+06** | 4.42E+10 | **1.44E+07** | 5.71E+10 |  |
| Worst | 1.47E+04 | 4.05E+02 | 2.58E+06 | 5.59E+10 | 1.78E+07 | 6.50E+10 |  |
| Mean | **1.26E+04** | 3.93E+02 | **2.46E+06** | 4.44E+10 | **1.43E+07** | 5.45E+10 |  |
| Std | 2.05E+03 | 7.82E+00 | 6.86E+04 | 6.43E+09 | 2.29E+06 | 6.86E+09 |  |
| ANDE | Best | 9.62E+03 | 3.74E+02 | 2.34E+06 | 1.90E+10 | 1.34E+07 | 2.43E+10 |  |
| Median | **1.26E+04** | 3.91E+02 | 2.65E+06 | 2.34E+10 | 1.69E+07 | 3.18E+10 |  |
| Worst | 1.48E+04 | 3.99E+02 | 3.03E+06 | 2.91E+10 | 2.38E+07 | 3.86E+10 |  |
| Mean | **1.26E+04** | 3.91E+02 | 2.69E+06 | 2.42E+10 | 1.74E+07 | 3.13E+10 |  |
| Std | 1.82E+03 | 6.84E+00 | 1.87E+05 | 2.90E+09 | 3.05E+06 | 4.46E+09 |  |
| ANDE-2 | Best | 1.26E+04 | 2.62E+02 | 3.57E+06 | 1.06E+10 | 2.67E+07 | 1.54E+10 |  |
| Median | 1.37E+04 | **3.25E+02** | 4.32E+06 | **1.61E+10** | 3.06E+07 | **2.91E+10** |  |
| Worst | 1.45E+04 | 3.61E+02 | 6.57E+06 | 2.62E+10 | 3.58E+07 | 4.50E+10 |  |
| Mean | 1.37E+04 | **3.17E+02** | 4.62E+06 | **1.79E+10** | 3.10E+07 | **2.69E+10** |  |
| Std | 4.58E+02 | 2.81E+01 | 8.90E+05 | 5.73E+09 | 2.85E+06 | 8.19E+09 |  |

**Table S2** Experimental Comparisons between ANDE, ANDE-1 and ANDE-2 algorithms, FES= 6.00E+05

|  |  | F1 | F2 | F3 | F4 | F5 | F6 | F7 |
| --- | --- | --- | --- | --- | --- | --- | --- | --- |
| ANDE-1 | Best | 3.01E+03 | 4.85E+03 | 4.76E-02 | 8.32E+11 | 3.88E+07 | 4.98E+00 | 7.73E+05 |
| Median | 3.59E+03 | 5.09E+03 | 7.80E-02 | **1.20E+12** | **5.97E+07** | 1.00E+01 | **1.08E+06** |
| Worst | 4.62E+03 | 5.28E+03 | 2.49E-01 | 1.91E+12 | 9.35E+07 | 1.21E+01 | 1.37E+06 |
| Mean | 3.64E+03 | 5.08E+03 | 9.59E-02 | **1.30E+12** | **6.34E+07** | 8.34E+00 | **1.04E+06** |
| Std | 4.16E+02 | 1.17E+02 | 5.68E-02 | 3.12E+11 | 1.31E+07 | 2.92E+00 | 1.78E+05 |
| ANDE | Best | 3.47E+01 | 2.43E+03 | 4.70E-03 | 1.65E+12 | 6.36E+07 | 2.47E+00 | 8.41E+05 |
| Median | 4.65E+01 | 2.56E+03 | 5.31E-03 | 2.54E+12 | 8.15E+07 | 4.79E+00 | 1.45E+06 |
| Worst | 5.67E+01 | 2.70E+03 | 5.82E-03 | 3.16E+12 | 1.04E+08 | 6.38E+00 | 2.82E+06 |
| Mean | 4.57E+01 | 2.57E+03 | 5.30E-03 | 2.44E+12 | 8.30E+07 | 4.39E+00 | 1.53E+06 |
| Std | 5.92E+00 | 7.50E+01 | 3.56E-04 | 4.23E+11 | 1.29E+07 | 1.44E+00 | 2.82E+05 |
| ANDE-2 | Best | 4.31E+00 | 1.17E+03 | 2.15E-03 | 1.57E+12 | 5.27E+07 | 8.53E-01 | 2.20E+06 |
| Median | **5.17E+00** | **1.35E+03** | **2.38E-03** | 3.48E+12 | 8.56E+07 | **2.33E+00** | 3.73E+06 |
| Worst | 6.29E+00 | 1.42E+03 | 2.68E-03 | 5.17E+12 | 1.13E+08 | 3.01E+00 | 1.15E+07 |
| Mean | **5.20E+00** | **1.34E+03** | **2.40E-03** | 3.44E+12 | 8.29E+07 | **1.97E+00** | 4.38E+06 |
| Std | 4.87E-01 | 6.15E+01 | 1.57E-04 | 8.41E+11 | 1.89E+07 | 7.99E-01 | 2.22E+06 |
|  |  | F8 | F9 | F10 | F11 | F12 | F13 | F14 |
| ANDE-1 | Best | 2.84E+07 | 2.42E+08 | 4.02E+03 | 9.83E+01 | 3.88E+05 | 4.77E+03 | 7.97E+08 |
| Median | **3.38E+07** | 2.70E+08 | 4.28E+03 | 1.29E+02 | **4.70E+05** | 1.66E+04 | 9.45E+08 |
| Worst | 1.62E+08 | 3.29E+08 | 4.57E+03 | 1.68E+02 | 5.32E+05 | 3.99E+04 | 1.04E+09 |
| Mean | **5.72E+07** | 2.76E+08 | 4.29E+03 | 1.26E+02 | **4.62E+05** | 1.89E+04 | **9.25E+08** |
| Std | 4.12E+07 | 2.60E+07 | 1.29E+02 | 1.88E+01 | 4.42E+04 | 1.01E+04 | 7.52E+07 |
| ANDE | Best | 4.19E+07 | 2.49E+08 | 3.35E+03 | 5.59E+01 | 4.45E+05 | 3.02E+03 | 8.44E+08 |
| Median | 4.50E+07 | **2.63E+08** | 3.77E+03 | 9.79E+01 | 4.87E+05 | **4.56E+03** | **9.32E+08** |
| Worst | 1.48E+08 | 3.24E+08 | 4.38E+03 | 1.46E+02 | 5.51E+05 | 1.67E+04 | 1.03E+09 |
| Mean | 7.02E+07 | **2.71E+08** | 3.83E+03 | 1.01E+02 | 4.76E+05 | **5.30E+03** | 9.33E+08 |
| Std | 3.31E+07 | 2.22E+07 | 2.60E+02 | 2.78E+01 | 3.33E+04 | 3.26E+03 | 4.91E+07 |
| ANDE-2 | Best | 4.47E+07 | 2.82E+08 | 2.76E+03 | 2.49E+01 | 7.26E+05 | 3.24E+03 | 1.09E+09 |
| Median | 8.67E+07 | 3.36E+08 | **2.98E+03** | **6.56E+01** | 7.62E+05 | 7.35E+03 | 1.25E+09 |
| Worst | 1.48E+08 | 4.47E+08 | 3.27E+03 | 1.11E+02 | 8.87E+05 | 1.95E+04 | 1.37E+09 |
| Mean | 8.02E+07 | 3.42E+08 | **3.00E+03** | **6.60E+01** | 7.85E+05 | 7.78E+03 | 1.24E+09 |
| Std | 3.57E+07 | 4.29E+07 | 1.29E+02 | 3.10E+01 | 5.46E+04 | 4.88E+03 | 8.99E+07 |
|  |  | F15 | F16 | F17 | F18 | F19 | F20 |  |
| ANDE-1 | Best | 4.92E+03 | 3.35E+02 | 8.36E+05 | 4.93E+05 | 3.11E+06 | 1.44E+06 |  |
| Median | 5.27E+03 | 3.65E+02 | **9.04E+05** | 4.90E+06 | **3.42E+06** | 3.23E+06 |  |
| Worst | 5.67E+03 | 3.91E+02 | 9.63E+05 | 4.02E+07 | 3.73E+06 | 5.60E+07 |  |
| Mean | 5.27E+03 | 3.62E+02 | **8.95E+05** | 9.23E+06 | **3.41E+06** | 8.30E+06 |  |
| Std | 2.05E+02 | 1.65E+01 | 4.21E+04 | 1.11E+07 | 2.09E+05 | 1.40E+07 |  |
| ANDE | Best | 4.18E+03 | 3.14E+02 | 9.29E+05 | 5.60E+04 | 3.49E+06 | 5.79E+04 |  |
| Median | **4.36E+03** | 3.59E+02 | 9.93E+05 | **193E+05** | 3.83E+06 | **1.20E+05** |  |
| Worst | 4.67E+03 | 3.82E+02 | 1.06E+06 | 3.42E+05 | 4.37E+06 | 3.89E+05 |  |
| Mean | **4.38E+03** | 3.58E+02 | 9.87E+05 | **1.93E+05** | 3.91E+06 | **1.45E+05** |  |
| Std | 1.38E+02 | 2.02E+01 | 4.20E+04 | 7.75E+04 | 2.40E+05 | 9.03E+04 |  |
| ANDE-2 | Best | 3.96E+03 | 2.54E+02 | 1.28E+06 | 9.38E+04 | 5.67E+06 | 4.52E+04 |  |
| Median | 4.40E+03 | **3.11E+02** | 1.40E+06 | 5.18E+06 | 7.58E+06 | 1.36E+07 |  |
| Worst | 9.26E+03 | 3.28E+02 | 1.57E+06 | 2.84E+08 | 1.04E+07 | 2.49E+08 |  |
| Mean | 4.74E+03 | **3.03E+02** | 1.41E+06 | 3.25E+07 | 8.07E+06 | 3.00E+07 |  |
| Std | 1.29E+03 | 2.46E+01 | 8.81E+04 | 7.19E+07 | 1.38E+06 | 6.23E+07 |  |

**Table S3** Experimental Comparisons between ANDE, ANDE-1 and ANDE-2 algorithms, FES= 3.00E+06

|  |  | F1 | F2 | F3 | F4 | F5 | F6 | F7 |
| --- | --- | --- | --- | --- | --- | --- | --- | --- |
| ANDE-1 | Best | 1.58E-21 | 5.58E+02 | 9.23E-14 | 9.79E+10 | 5.17E+07 | 1.63E+01 | 5.88E-01 |
| Median | 1.71E-21 | 6.08E+02 | 9.23E-14 | **1.56E+11** | **7.36E+07** | 1.81E+01 | 1.72E+00 |
| Worst | 1.81E-21 | 6.50E+02 | 9.94E-14 | 4.44E+11 | 1.13E+08 | 1.89E+01 | 2.42E+01 |
| Mean | 1.70E-21 | 6.07E+02 | 9.33E-14 | **2.23E+11** | **7.44E+07** | 1.79E+01 | 5.03E+00 |
| Std | 1.08E-22 | 2.81E+01 | 2.50E-15 | 1.19E+11 | 2.01E+07 | 8.18E-01 | 7.34E+00 |
| ANDE | Best | 0.00E+00 | 3.45E+02 | 7.46E-14 | 2.92E+11 | 6.66E+07 | 1.54E+01 | 2.91E-01 |
| Median | **0.00E+00** | 3.74E+02 | **7.46E-14** | 4.82E+11 | 8.75E+07 | 1.72E+01 | **1.33E+00** |
| Worst | 2.47E-25 | 4.00E+02 | 7.46E-14 | 7.60E+11 | 1.23E+08 | 1.75E+01 | 5.44E+00 |
| Mean | **3.72E-26** | 3.72E+02 | **7.46E-14** | 5.13E+11 | 9.19E+07 | 1.64E+01 | **1.80E+00** |
| Std | 7.23E-26 | 1.79E+01 | 0.00E+00 | 1.49E+11 | 1.61E+07 | 6.72E-01 | 1.51E+00 |
| ANDE-2 | Best | 0.00E+00 | 3.25E+02 | 7.81E-14 | 7.54E+11 | 8.42E+07 | 1.47E+01 | 9.71E+02 |
| Median | 1.79E-24 | **3.53E+02** | 8.52E-14 | 1.35E+12 | 1.09E+08 | **1.56E+01** | 6.63E+03 |
| Worst | 2.58E-23 | 3.82E+02 | 8.52E-14 | 2.66E+12 | 1.82E+08 | 1.65E+01 | 1.86E+04 |
| Mean | 4.96E-24 | **3.51E+02** | 8.42E-14 | 1.46E+12 | 1.19E+08 | **1.57E+01** | 8.58E+03 |
| Std | 7.69E-24 | 1.81E+01 | 2.29E-15 | 4.83E+11 | 3.20E+07 | 5.14E-01 | 5.51E+03 |
|  |  | F8 | F9 | F10 | F11 | F12 | F13 | F14 |
| ANDE-1 | Best | 1.07E+00 | 3.79E+07 | 2.58E+03 | 1.23E+02 | 3.22E+04 | 5.62E+02 | 1.69E+08 |
| Median | **6.66E+02** | 4.54E+07 | 2.86E+03 | 1.31E+02 | **4.27E+04** | 1.13E+03 | **1.81E+08** |
| Worst | 3.98E+06 | 4.99E+07 | 2.97E+03 | 1.39E+02 | 6.24E+04 | 1.47E+03 | 1.95E+08 |
| Mean | **1.76E+05** | 4.49E+07 | 2.83E+03 | 1.32E+02 | **4.52E+04** | 1.14E+03 | **1.81E+08** |
| Std | 7.95E+05 | 3.78E+06 | 1.01E+02 | 4.81E+00 | 7.94E+03 | 2.50E+02 | 9.20E+06 |
| ANDE | Best | 9.69E+05 | 3.32E+07 | 2.89E+03 | 5.74E+01 | 3.88E+04 | 8.11E+02 | 1.79E+08 |
| Median | 1.08E+07 | **4.14E+07** | 3.06E+03 | **8.84E+01** | 4.89E+04 | **1.07E+03** | 1.86E+08 |
| Worst | 7.04E+07 | 5.03E+07 | 3.27E+03 | 1.13E+02 | 6.45E+04 | 1.69E+03 | 2.00E+08 |
| Mean | 1.25E+07 | **4.12E+07** | 3.06E+03 | **8.95E+01** | 4.89E+04 | **1.11E+03** | 1.87E+08 |
| Std | 2.53E+07 | 4.90E+06 | 1.30E+02 | 1.91E+01 | 6.04E+03 | 2.37E+02 | 7.01E+06 |
| ANDE-2 | Best | 3.56E+07 | 5.23E+07 | 2.17E+03 | 7.72E+01 | 7.41E+04 | 9.66E+02 | 2.11E+08 |
| Median | 4.02E+07 | 6.06E+07 | **2.36E+03** | 9.62E+01 | 8.48E+04 | 1.44E+03 | 2.51E+08 |
| Worst | 9.86E+07 | 6.95E+07 | 2.70E+03 | 1.15E+02 | 9.69E+04 | 2.75E+03 | 2.75E+08 |
| Mean | 6.39E+07 | 6.16E+07 | **2.38E+03** | 9.54E+01 | 8.48E+04 | 1.63E+03 | 2.48E+08 |
| Std | 2.83E+07 | 5.04E+06 | 1.39E+02 | 8.85E+00 | 7.75E+03 | 5.27E+02 | 1.76E+07 |
|  |  | F15 | F16 | F17 | F18 | F19 | F20 |  |
| ANDE-1 | Best | 3.29E+03 | 3.08E+02 | 1.74E+05 | 2.08E+03 | 1.26E+06 | 2.00E+03 |  |
| Median | 3.46E+03 | 3.17E+02 | **1.90E+05** | 2.55E+03 | **1.34E+06** | 2.44E+03 |  |
| Worst | 3.65E+03 | 3.36E+02 | 2.01E+05 | 4.34E+03 | 1.47E+06 | 2.89E+03 |  |
| Mean | 3.44E+03 | 3.18E+02 | **1.89E+05** | 2.61E+03 | **1.36E+06** | 2.43E+03 |  |
| Std | 1.01E+02 | 6.96E+00 | 8.98E+03 | 5.52E+02 | 6.77E+04 | 1.96E+02 |  |
| ANDE | Best | 2.92E+03 | 2.86E+02 | 1.93E+05 | 1.94E+03 | 1.53E+06 | 1.94E+03 |  |
| Median | 3.23E+03 | 3.05E+02 | 2.01E+05 | **2.41E+03** | 1.61E+06 | 2.20E+03 |  |
| Worst | 3.35E+03 | 3.15E+02 | 2.21E+05 | 2.70E+03 | 1.79E+06 | 2.58E+03 |  |
| Mean | 3.19E+03 | 3.04E+02 | 2.02E+05 | **2.35E+03** | 1.63E+06 | 2.20E+03 |  |
| Std | 1.26E+03 | 7.69E+00 | 1.00E+04 | 2.26E+02 | 8.36E+04 | 1.63E+02 |  |
| ANDE-2 | Best | 2.77E+03 | 2.57E+02 | 3.11E+05 | 2.85E+03 | 1.86E+06 | 1.59E+03 |  |
| Median | **3.11E+03** | **2.77E+02** | 3.33E+05 | 6.29E+03 | 2.09E+06 | **2.00E+03** |  |
| Worst | 3.27E+03 | 2.86E+02 | 3.95E+05 | 3.31E+04 | 2.37E+06 | 2.18E+03 |  |
| Mean | **3.06E+03** | **2.75E+02** | 3.41E+05 | 1.08E+04 | 2.13E+06 | **1.96E+03** |  |
| Std | 1.51E+02 | 9.15E+00 | 2.86E+04 | 9.093+03 | 1.54E+05 | 1.62E+02 |  |

**Table S4** Experimental Comparisons between ANDE, ANDE-1 and ANDE-2 and state-of-the-art algorithms, FES= 1.20E+05

|  |  | F1 | F2 | F3 | F4 | F5 | F6 | F7 |
| --- | --- | --- | --- | --- | --- | --- | --- | --- |
| ANDE | Best | 2.48E+08 | 8.52E+03 | 1.14E+01 | 5.38E+12 | 9.43E+07 | 2.00E+01 | 1.48E+09 |
| Median | 2.67E+08 | 8.65E+03 | 1.18E+01 | 1.38E+13 | 2.39E+08 | **2.05E+01** | 3.02E+09 |
| Worst | 2.92E+08 | 8.92E+03 | 1.20E+01 | 2.67E+13 | 2.90E+08 | 2.20E+01 | 4.63E+09 |
| Mean | 2.66E+08 | 8.67E+03 | 1.18E+01 | 1.51E+13 | 2.20E+08 | **2.08E+01** | 3.05E+09 |
| Std | 1.33E+07 | 9.36E+01 | 1.45E-01 | 5.61E+12 | 6.28E+07 | 7.02E-01 | 8.06E+08 |
| ANDE_1 | Best | 2.78E+08 | 9.33E+03 | 1.23E+01 | 7.55E+12 | 7.67E+07 | 2.08E+01 | 1.22E+09 |
| Median | 3.32E+08 | 9.53E+03 | 1.26E+01 | 1.40E+13 | 2.85E+08 | 2.21E+01 | 2.02E+09 |
| Worst | 3.86E+08 | 9.80E+03 | 1.29E+01 | 1.82E+13 | 3.23E+08 | 2.34E+01 | 3.26E+09 |
| Mean | 3.32E+08 | 9.53E+03 | 1.26E+01 | 1.34E+13 | 2.58E+08 | 2.19E+01 | 2.09E+09 |
| Std | 2.55E+07 | 1.17E+02 | 1.90E-01 | 3.35E+12 | 7.74E+07 | 9.38E-01 | 6.22E+08 |
| ANDE_2 | Best | 1.22E+08 | 7.53E+03 | 1.07E+01 | 1.10E+13 | 9.37E+07 | 2.00E+01 | 2.61E+09 |
| Median | 1.30E+08 | 7.68E+03 | 1.08E+01 | 1.56E+13 | 1.98E+08 | 2.05E+01 | 4.86E+09 |
| Worst | 1.43E+08 | 7.89E+03 | 1.12E+01 | 2.54E+13 | 3.25E+08 | 2.19E+01 | 6.19E+09 |
| Mean | 1.31E+08 | 7.71E+03 | 1.09E+01 | 1.72E+13 | 2.04E+08 | 2.09E+01 | 4.58E+09 |
| Std | 6.54E+06 | 1.06E+02 | 1.53E-01 | 4.01E+12 | 7.16E+07 | 7.32E-01 | 1.01E+09 |
| SDENS | Best | 3.93E+09 | 1.16E+04 | 1.99E+01 | 3.90E+13 | 3.14E+08 | 9.88E+05 | 3.07E+10 |
| Median | 4.74E+09 | 1.19E+04 | 2.01E+01 | 4.60E+13 | 3.32E+08 | 2.03E+06 | 3.57E+10 |
| Worst | 6.19E+09 | 1.20E+04 | 2.02E+01 | 7.90E+13 | 3.41E+08 | 2.39E+06 | 4.70E+10 |
| Mean | 5.01E+09 | 1.19E+04 | 2.01E+01 | 5.10E+13 | 3.29E+08 | 1.84E+06 | 3.75E+10 |
| Std | 9.18E+08 | 9.89E+01 | 1.17E–01 | 1.46E+13 | 1.04E+07 | 4.77E+05 | 5.46E+09 |
| jDElsgo | Best | 2.78E+09 | 1.06E+04 | 1.81E+01 | 8.06E+13 | 2.98E+08 | 3.36E+06 | 2.89E+10 |
| Median | 3.72E+09 | 1.09E+09 | 1.88E+01 | 1.43E+14 | 3.38E+08 | 4.24E+06 | 5.40E+10 |
| Worst | 4.89E+09 | 1.13E+04 | 1.97E+01 | 2.30E+14 | 3.75E+08 | 4.84E+06 | 7.23E+10 |
| Mean | 3.70E+09 | 1.09E+04 | 1.87E+01 | 1.40E+14 | 3.39E+08 | 4.26E+06 | 5.39E+10 |
| Std | 5.11E+08 | 1.75E+02 | 4.46E-01 | 3.69E+13 | 1.82E+07 | 3.91E+05 | 1.07E+10 |
| DECC-DML | Best | 2.28E+08 | 5.51E+03 | 8.22E+00 | 3.80E+13 | 1.43E+08 | 1.25E+06 | 2.65E+09 |
| Median | 2.85E+08 | 5.76E+03 | 9.71E+00 | 6.40E+13 | 2.85E+08 | 1.96E+06 | 5.50E+09 |
| Worst | 7.02E+08 | 5.96E+03 | 1.01E+01 | 1.20E+14 | 5.21E+08 | 2.00E+07 | 1.17E+10 |
| Mean | 4.09E+08 | 5.75E+03 | 9.51E+00 | 6.76E+13 | 3.00E+08 | 2.70E+06 | 5.97E+09 |
| Std | 1.75E+08 | 1.35E+02 | 5.55E-01 | 2.02E+13 | 9.31E+07 | 3.62E+06 | 2.49E+09 |
| DASA | Best | 1.15E+05 | 4.65E+02 | 2.10E+00 | 2.05E+12 | 5.51E+08 | 1.98E+07 | 1.78E+07 |
| Median | **1.50E+05** | **5.24E+02** | **2.34E+00** | 6.61E+12 | 8.06E+08 | 1.99E+07 | 4.14E+07 |
| Worst | 1.94E+05 | 5.95E+02 | 2.68E+00 | 1.04E+13 | 1.05E+09 | 2.00E+07 | 1.02E+08 |
| Mean | **1.50E+05** | **5.18E+02** | **2.35E+00** | 7.00E+12 | 8.32E+08 | 1.99E+07 | 4.53E+07 |
| Std | 1.76E+04 | 2.77E+01 | 1.29E-01 | 2.21E+12 | 1.30E+08 | 5.50E+04 | 1.91E+07 |
| EOEA | Best | 1.02E+08 | 3.70E+03 | 3.74E+00 | 7.36E+12 | 1.79E+07 | 3.46E+06 | 2.13E+09 |
| Median | 1.44E+08 | 4.11E+03 | 4.24E+00 | 1.18E+13 | **2.79E+07** | 4.11E+06 | 3.23E+09 |
| Worst | 2.08E+08 | 4.30E+03 | 4.58E+00 | 2.43E+13 | 7.79E+07 | 5.06E+06 | 4.04E+09 |
| Mean | 1.52E+08 | 4.06E+03 | 4.22E+00 | 1.41E+13 | **3.63E+07** | 4.27E+06 | 3.02E+09 |
| Std | 3.11E+07 | 2.25E+02 | 2.20E-01 | 5.00E+12 | 1.77E+07 | 4.50E+05 | 6.63E+08 |
| MA-SW-chains | Best | 2.15E+07 | 3.32E+03 | 1.13E+01 | 1.22E+12 | 9.35E+07 | 2.02E+01 | 4.54E+06 |
| Median | 2.76E+07 | 3.75E+03 | 1.15E+01 | **2.04E+12** | 2.64E+08 | 2.08E+01 | **4.91E+06** |
| Worst | 3.51E+07 | 1.00E+04 | 1.22E+01 | 3.35E+12 | 3.42E+08 | 1.16E+06 | 5.71E+06 |
| Mean | 2.83E+07 | 5.09E+03 | 1.16E+01 | **2.12E+12** | 2.52E+08 | 8.14E+04 | **4.90E+06** |
| Std | 3.06E+06 | 2.38E+03 | 2.68E-01 | 6.21E+11 | 6.49E+07 | 2.84E+05 | 2.59E+05 |
| DMS-PSO-SHS | Best | 8.36E+08 | 7.30E+03 | 1.89E+01 | 8.96E+12 | 2.03E+08 | 5.44E+01 | 1.69E+09 |
| Median | 5.18E+09 | 8.16E+03 | 1.89E+01 | 1.16E+13 | 2.18E+08 | 5.68E+01 | 2.15E+09 |
| Worst | 5.91E+09 | 9.46E+03 | 1.93E+01 | 1.81E+13 | 2.38E+08 | 6.97E+01 | 2.50E+09 |
| Mean | 5.48E+09 | 8.94E+03 | 1.90E+01 | 1.25E+13 | 2.87E+08 | 5.78E+01 | 2.25E+09 |
| Std | 1.25E+09 | 9.99E+02 | 1.52E+00 | 2.64E+12 | 2.16E+07 | 2.16E+00 | 3.49E+08 |
|  |  | F8 | F9 | F10 | F11 | F12 | F13 | F14 |
| ANDE | Best | 4.47E+07 | 2.35E+09 | 1.00E+04 | 1.06E+02 | 1.96E+06 | 6.56E+07 | 4.50E+09 |
| Median | 1.06E+08 | 2.80E+09 | 1.21E+04 | 1.29E+02 | 2.24E+06 | 1.10E+08 | 5.12E+09 |
| Worst | 1.62E+08 | 3.22E+09 | 1.32E+04 | 1.65E+02 | 2.39E+06 | 1.34E+08 | 5.47E+09 |
| Mean | 9.13E+07 | 2.79E+09 | 1.20E+04 | 1.33E+02 | 2.21E+06 | 1.06E+08 | 5.04E+09 |
| Std | 3.58E+07 | 2.58E+08 | 9.75E+02 | 1.87E+01 | 1.15E+05 | 1.98E+07 | 2.68E+08 |
| ANDE_1 | Best | 3.81E+07 | 2.35E+09 | 8.16E+03 | 1.37E+02 | 1.79E+06 | 1.81E+08 | 4.80E+09 |
| Median | **4.68E+07** | 2.83E+09 | 9.93E+03 | 1.66E+02 | 2.04E+06 | 3.13E+08 | 5.30E+09 |
| Worst | 1.11E+08 | 3.15E+09 | 1.32E+04 | 1.84E+02 | 2.19E+06 | 5.03E+08 | 5.88E+09 |
| Mean | **5.42E+07** | 2.82E+09 | 1.03E+04 | 1.63E+02 | 2.02E+06 | 3.06E+08 | 5.29E+09 |
| Std | 2.15E+07 | 2.16E+08 | 1.78E+03 | 1.30E+01 | 1.00E+05 | 9.63E+07 | 3.02E+08 |
| ANDE_2 | Best | 4.47E+07 | 3.97E+09 | 1.12E+04 | 7.88E+01 | 2.85E+06 | 4.26E+07 | 6.77E+09 |
| Median | 4.72E+07 | 4.50E+09 | 1.21E+04 | 1.10E+02 | 3.26E+06 | 1.07E+08 | 7.43E+09 |
| Worst | 1.33E+08 | 6.02E+09 | 1.28E+04 | 1.25E+02 | 4.31E+06 | 2.96E+08 | 8.93E+09 |
| Mean | 7.51E+07 | 4.70E+09 | 1.20E+04 | 1.05E+02 | 3.36E+06 | 1.27E+08 | 7.48E+09 |
| Std | 3.30E+07 | 5.91E+08 | 4.06E+02 | 1.60E+01 | 3.63E+05 | 7.74E+07 | 5.41E+08 |
| SDENS | Best | 6.05E+08 | 1.13E+10 | 1.37E+04 | 2.27E+02 | 2.71E+06 | 1.70E+10 | 1.42E+10 |
| Median | 6.23E+08 | 1.52E+10 | 1.38E+04 | 2.27E+02 | 2.83E+06 | 1.91E+10 | 1.73E+10 |
| Worst | 1.20E+09 | 1.89E+10 | 1.42E+04 | 2.28E+02 | 3.29E+06 | 2.01E+10 | 2.31E+10 |
| Mean | 7.71E+08 | 1.56E+10 | 1.39E+04 | 2.27E+02 | 2.95E+06 | 1.88E+10 | 1.84E+10 |
| Std | 2.27E+08 | 2.77E+09 | 2.51E+02 | 3.49E–01 | 2.37E+05 | 1.07E+09 | 3.56E+09 |
| jDElsgo | Best | 1.04E+09 | 1.43E+10 | 1.31E+04 | 2.02E+02 | 2.76E+06 | 2.23E+09 | 1.95E+10 |
| Median | 2.29E+09 | 1.59E+10 | 1.43E+04 | 2.20E+02 | 3.18E+06 | 3.70E+09 | 2.32E+10 |
| Worst | 5.42E+09 | 2.07E+10 | 1.51E+04 | 2.26E+02 | 3.65E+06 | 5.44E+09 | 2.76E+10 |
| Mean | 2.39E+09 | 1.64E+10 | 1.43E+04 | 2.19E+02 | 3.15E+06 | 3.76E+09 | 2.32E+10 |
| Std | 9.13E+08 | 1.73E+09 | 4.38E+02 | 5.92E+00 | 2.19E+05 | 1.04E+09 | 2.03E+09 |
| DECC-DML | Best | 2.23E+09 | 4.09E+09 | 1.32E+04 | 1.02E+02 | 4.07E+06 | 1.09E+08 | 1.26E+10 |
| Median | 4.92E+09 | 4.91E+09 | 1.39E+04 | 1.22E+02 | 4.68E+06 | 1.82E+08 | 1.37E+10 |
| Worst | 1.35E+10 | 5.54E+09 | 1.45E+04 | 1.70E+02 | 5.35E+06 | 3.72E+08 | 1.51E+10 |
| Mean | 5.57E+09 | 4.89E+09 | 1.38E+04 | 1.24E+02 | 4.70E+06 | 2.11E+08 | 1.37E+10 |
| Std | 2.56E+09 | 3.77E+08 | 3.24E+02 | 1.38E+01 | 2.99E+05 | 9.68E+07 | 6.86E+08 |
| DASA | Best | 1.00E+07 | 6.52E+08 | 7.02E+03 | 2.02E+02 | 6.40E+05 | 1.14E+04 | 1.64E+09 |
| Median | 1.05E+08 | 7.58E+08 | 7.91E+03 | 2.03E+02 | 6.82E+05 | **3.04E+04** | 2.00E+09 |
| Worst | 1.17E+09 | 9.34E+08 | 8.63E+03 | 2.03E+02 | 7.62E+05 | 4.87E+04 | 2.19E+09 |
| Mean | 2.36E+08 | 7.67E+08 | 7.87E+03 | 2.03E+02 | 6.92E+05 | **3.11E+04** | 1.97E+09 |
| Std | 3.27E+08 | 7.30E+07 | 4.55E+02 | 3.69E-01 | 3.93E+04 | 8.29E+03 | 1.39E+08 |
| EOEA | Best | 4.76E+09 | 5.75E+08 | 6.02E+03 | 6.01E+01 | 7.77E+05 | 1.63E+06 | 1.90E+09 |
| Median | 1.21E+10 | 6.62E+08 | 6.35E+03 | **6.29E+01** | 8.08E+05 | 2.04E+06 | 2.14E+09 |
| Worst | 1.95E+10 | 7.94E+08 | 7.11E+03 | 1.12E+02 | 9.34E+05 | 3.36E+06 | 2.23E+09 |
| Mean | 1.23E+10 | 6.76E+08 | 6.46E+03 | 7.26E+01 | 8.35E+05 | 2.26E+06 | 2.13E+09 |
| Std | 5.18E+09 | 6.94E+07 | 3.43E+02 | 1.71E+01 | 5.21E+04 | 5.77E+05 | 9.67E+07 |
| MA-SW-chains | Best | 3.30E+07 | 4.48E+08 | 3.62E+03 | 5.01E+01 | 2.20E+05 | 7.64E+05 | 8.16E+08 |
| Median | 4.17E+07 | **5.60E+08** | **4.15E+03** | 6.41E+01 | **2.40E+05** | 9.04E+05 | **8.81E+08** |
| Worst | 8.55E+08 | 6.45E+08 | 1.00E+04 | 7.13E+01 | 2.62E+05 | 1.11E+06 | 1.04E+09 |
| Mean | 1.21E+08 | **5.54E+08** | **5.12E+03** | **6.31E+01** | **2.40E+05** | 9.13E+05 | **8.95E+08** |
| Std | 2.11E+08 | 5.20E+07 | 2.20E+03 | 5.53E+00 | 1.26E+04 | 8.09E+04 | 6.60E+07 |
| DMS-PSO-SHS | Best | 8.20E+08 | 4.26E+08 | 8.33E+03 | 1.05E+02 | 3.55E+06 | 4.16E+06 | 6.13E+09 |
| Median | 9.43E+08 | 6.72E+08 | 1.10E+04 | 1.16E+02 | 3.73E+06 | 7.23E+06 | 1.01E+10 |
| Worst | 1.09E+09 | 8.36E+08 | 1.52E+04 | 1.47E+02 | 5.44E+06 | 8.67E+06 | 1.42E+10 |
| Mean | 9.60E+08 | 6.95E+08 | 1.21E+04 | 1.20E+02 | 4.09E+06 | 7.83E+06 | 1.29E+10 |
| Std | 8.17E+07 | 5.15E+07 | 4.22E+03 | 2.21E+01 | 4.26E+05 | 5.16E+05 | 2.91E+09 |
|  |  | F15 | F16 | F17 | F18 | F19 | F20 |  |
| ANDE | Best | 9.62E+03 | 3.74E+02 | 2.34E+06 | 1.90E+10 | 1.34E+07 | 2.43E+10 |  |
| Median | 1.26E+04 | 3.91E+02 | 2.65E+06 | 2.34E+10 | 1.69E+07 | 3.18E+10 |  |
| Worst | 1.48E+04 | 3.99E+02 | 3.03E+06 | 2.91E+10 | 2.38E+07 | 3.86E+10 |  |
| Mean | 1.26E+04 | 3.91E+02 | 2.69E+06 | 2.42E+10 | 1.74E+07 | 3.13E+10 |  |
| Std | 1.82E+03 | 6.84E+00 | 1.87E+05 | 2.90E+09 | 3.05E+06 | 4.46E+09 |  |
| ANDE_1 | Best | 9.24E+03 | 3.79E+02 | 2.36E+06 | 3.30E+10 | 1.01E+07 | 4.14E+10 |  |
| Median | 1.35E+04 | 3.92E+02 | 2.46E+06 | 4.42E+10 | 1.44E+07 | 5.71E+10 |  |
| Worst | 1.47E+04 | 4.05E+02 | 2.58E+06 | 5.59E+10 | 1.78E+07 | 6.50E+10 |  |
| Mean | 1.26E+04 | 3.93E+02 | 2.46E+06 | 4.44E+10 | 1.43E+07 | 5.45E+10 |  |
| Std | 2.05E+03 | 7.82E+00 | 6.86E+04 | 6.43E+09 | 2.29E+06 | 6.86E+09 |  |
| ANDE_2 | Best | 1.26E+04 | 2.62E+02 | 3.57E+06 | 1.06E+10 | 2.67E+07 | 1.54E+10 |  |
| Median | 1.37E+04 | 3.25E+02 | 4.32E+06 | 1.61E+10 | 3.06E+07 | 2.91E+10 |  |
| Worst | 1.45E+04 | 3.61E+02 | 6.57E+06 | 2.62E+10 | 3.58E+07 | 4.50E+10 |  |
| Mean | 1.37E+04 | 3.17E+02 | 4.62E+06 | 1.79E+10 | 3.10E+07 | 2.69E+10 |  |
| Std | 4.58E+02 | 2.81E+01 | 8.90E+05 | 5.73E+09 | 2.85E+06 | 8.19E+09 |  |
| SDENS | Best | 1.36E+04 | 4.15E+02 | 3.84E+06 | 2.00E+11 | 1.19E+07 | 2.39E+11 |  |
| Median | 1.45E+04 | 4.15E+02 | 4.25E+06 | 2.09E+11 | 1.57E+07 | 2.62E+11 |  |
| Worst | 1.45E+04 | 4.15E+02 | 4.98E+06 | 2.35E+11 | 2.31E+07 | 2.82E+11 |  |
| Mean | 1.43E+04 | 4.15E+02 | 4.31E+06 | 2.11E+11 | 1.67E+07 | 2.61E+11 |  |
| Std | 3.72E+02 | 1.08E–01 | 4.04E+05 | 1.27E+10 | 3.71E+06 | 1.49E+10 |  |
| jDElsgo | Best | 1.44E+04 | 4.09E+02 | 4.28E+06 | 5.25E+10 | 2.07E+07 | 5.80E+10 |  |
| Median | 1.55E+04 | 4.17E+02 | 4.79E+06 | 6.37E+10 | 2.88E+07 | 8.14E+10 |  |
| Worst | 1.59E+04 | 4.24E+02 | 5.71E+06 | 8.76E+10 | 3.56E+07 | 1.11E+11 |  |
| Mean | 1.54E+04 | 4.17E+02 | 4.85E+06 | 6.60E+10 | 2.85E+07 | 7.99E+10 |  |
| Std | 3.33E+02 | 3.28E+00 | 3.53E+05 | 9.47E+09 | 3.38E+06 | 1.25E+10 |  |
| DECC-DML | Best | 1.58E+04 | 3.22E+02 | 7.48E+06 | 1.56E+09 | 1.77E+07 | 2.04E+09 |  |
| Median | 1.65E+04 | 3.73E+02 | 8.77E+06 | 3.30E+09 | 2.23E+07 | 3.93E+09 |  |
| Worst | 1.73E+04 | 4.28E+02 | 1.01E+07 | 4.06E+09 | 2.72E+07 | 5.09E+09 |  |
| Mean | 1.65E+04 | 3.75E+02 | 8.81E+06 | 3.08E+09 | 2.20E+07 | 3.84E+09 |  |
| Std | 3.61E+02 | 3.60E+01 | 6.86E+05 | 7.84E+08 | 2.36E+06 | 7.72E+08 |  |
| DASA | Best | 1.43E+04 | 3.97E+02 | 1.55E+06 | 2.16E+05 | 5.01E+06 | 1.93E+05 |  |
| Median | 1.56E+04 | 3.97E+02 | 1.67E+06 | 2.80E+05 | 5.78E+06 | 2.49E+05 |  |
| Worst | 1.63E+04 | 3.98E+02 | 1.79E+06 | 4.41E+05 | 6.58E+06 | 3.67E+05 |  |
| Mean | 1.54E+04 | 3.97E+02 | 1.67E+06 | 2.90E+05 | 5.91E+06 | 2.57E+05 |  |
| Std | 5.30E+02 | 2.96E-01 | 6.06E+04 | 5.39E+04 | 4.05E+05 | 4.80E+04 |  |
| EOEA | Best | 6.70E+03 | 1.08E+02 | 1.59E+06 | 3.51E+07 | 9.35E+06 | 6.32E+07 |  |
| Median | 7.35E+03 | **1.22E+02** | 1.73E+06 | 6.73E+07 | 1.13E+07 | 9.81E+07 |  |
| Worst | 7.77E+03 | 1.53E+02 | 1.79E+06 | 9.02E+07 | 1.25E+07 | 1.17E+08 |  |
| Mean | 7.31E+03 | **1.27E+02** | 1.71E+06 | 6.42E+07 | 1.12E+07 | 9.12E+07 |  |
| Std | 2.82E+02 | 1.55E+01 | 6.35E+04 | 1.91E+07 | 1.05E+06 | 1.77E+07 |  |
| MA-SW-chains | Best | 3.94E+03 | 2.01E+02 | 5.80E+05 | 2.22E+04 | 3.23E+06 | 2.01E+03 |  |
| Median | **4.29E+03** | 2.12E+02 | **6.78E+05** | **5.18E+04** | **3.63E+06** | **2.22E+03** |  |
| Worst | 9.63E+03 | 2.31E+02 | 7.50E+05 | 8.33E+04 | 4.05E+06 | 4.69E+03 |  |
| Mean | **4.83E+03** | 2.13E+02 | **6.78E+05** | **5.14E+04** | **3.63E+06** | **2.43E+03** |  |
| Std | 1.51E+03 | 9.19E+00 | 3.52E+04 | 1.64E+04 | 1.94E+05 | 5.43E+02 |  |
| DMS-PSO-SHS | Best | 6.04E+03 | 6.25E+02 | 3.18E+06 | 8.98E+06 | 3.28E+07 | 9.13E+06 |  |
| Median | 8.23E+03 | 7.42E+02 | 4.20E+06 | 1.18E+07 | 3.40E+07 | 1.24E+07 |  |
| Worst | 1.04E+04 | 7.94E+02 | 7.39E+06 | 1.76E+07 | 4.08E+07 | 2.05E+07 |  |
| Mean | 8.74E+03 | 7.49E+02 | 5.02E+06 | 1.53E+07 | 3.81E+07 | 1.56E+07 |  |
| Std | 2.05E+02 | 8.16E+01 | 4.15E+05 | 2.15E+06 | 5.33E+06 | 2.46E+06 |  |

**Table S5** Experimental Comparisons between ANDE, ANDE-1 and ANDE-2 and state-of-the-art algorithms, FES= 6.00E+05

|  |  | F1 | F2 | F3 | F4 | F5 | F6 | F7 |
| --- | --- | --- | --- | --- | --- | --- | --- | --- |
| ANDE | Best | 3.47E+01 | 2.43E+03 | 4.70E-03 | 1.65E+12 | 6.36E+07 | 2.47E+00 | 8.41E+05 |
| Median | 4.65E+01 | 2.56E+03 | 5.31E-03 | 2.54E+12 | 8.15E+07 | 4.79E+00 | 1.45E+06 |
| Worst | 5.67E+01 | 2.70E+03 | 5.82E-03 | 3.16E+12 | 1.04E+08 | 6.38E+00 | 2.82E+06 |
| Mean | 4.57E+01 | 2.57E+03 | 5.30E-03 | 2.44E+12 | 8.30E+07 | 4.39E+00 | 1.53E+06 |
| Std | 5.92E+00 | 7.50E+01 | 3.56E-04 | 4.23E+11 | 1.29E+07 | 1.44E+00 | 2.82E+05 |
| ANDE_1 | Best | 3.01E+03 | 4.85E+03 | 4.76E-02 | 8.32E+11 | 3.88E+07 | 4.98E+00 | 7.73E+05 |
| Median | 3.59E+03 | 5.09E+03 | 7.80E-02 | 1.20E+12 | 5.97E+07 | 1.00E+01 | 1.08E+06 |
| Worst | 4.62E+03 | 5.28E+03 | 2.49E-01 | 1.91E+12 | 9.35E+07 | 1.21E+01 | 1.37E+06 |
| Mean | 3.64E+03 | 5.08E+03 | 9.59E-02 | 1.30E+12 | 6.34E+07 | 8.34E+00 | 1.04E+06 |
| Std | 4.16E+02 | 1.17E+02 | 5.68E-02 | 3.12E+11 | 1.31E+07 | 2.92E+00 | 1.78E+05 |
| ANDE_2 | Best | 4.31E+00 | 1.17E+03 | 2.15E-03 | 1.57E+12 | 5.27E+07 | 8.53E-01 | 2.20E+06 |
| Median | 5.17E+00 | 1.35E+03 | 2.38E-03 | 3.48E+12 | 8.56E+07 | **2.33E+00** | 3.73E+06 |
| Worst | 6.29E+00 | 1.42E+03 | 2.68E-03 | 5.17E+12 | 1.13E+08 | 3.01E+00 | 1.15E+07 |
| Mean | 5.20E+00 | 1.34E+03 | 2.40E-03 | 3.44E+12 | 8.29E+07 | **1.97E+00** | 4.38E+06 |
| Std | 4.87E-01 | 6.15E+01 | 1.57E-04 | 8.41E+11 | 1.89E+07 | 7.99E-01 | 2.22E+06 |
| SDENS | Best | 3.82E+06 | 7.00E+03 | 5.13E+00 | 8.47E+12 | 1.51E+08 | 1.38E+01 | 5.73E+09 |
| Median | 4.59E+06 | 7.12E+03 | 6.27E+00 | 1.53E+13 | 1.83E+08 | 1.53E+01 | 7.73E+09 |
| Worst | 1.95E+07 | 7.17E+03 | 6.76E+00 | 2.85E+13 | 2.12E+08 | 1.74E+01 | 1.36E+10 |
| Mean | 7.87E+06 | 7.09E+03 | 6.12E+00 | 1.72E+13 | 1.81E+08 | 1.53E+01 | 9.28E+09 |
| Std | 5.94E+06 | 6.76E+01 | 6.30E–01 | 6.68E+12 | 2.29E+07 | 1.18E+00 | 3.44E+09 |
| jDElsgo | Best | 7.04E+04 | 3.67E+03 | 9.70E-01 | 7.89E+12 | 1.42E+08 | 2.20E+01 | 3.36E+09 |
| Median | 8.71E+04 | 3.93E+03 | 1.18E+00 | 1.29E+13 | 1.87E+08 | 3.24E+01 | 6.41E+09 |
| Worst | 1.23E+05 | 4.20E+03 | 1.58E+00 | 2.67E+13 | 2.30E+08 | 3.14E+02 | 1.10E+10 |
| Mean | 8.99E+04 | 3.95E+03 | 1.22E+00 | 1.39E+13 | 1.88E+08 | 5.97E+01 | 6.43E+09 |
| Std | 1.39E+04 | 1.32E+02 | 1.38E-01 | 4.60E+12 | 2.31E+07 | 5.81E+01 | 2.123+09 |
| DECC-DML | Best | 6.95E+01 | 2.51E+03 | 1.06E-02 | 7.92E+12 | 1.42E+08 | 4.59E+01 | 3.14E+08 |
| Median | 4.63E+02 | 2.64E+03 | 1.83E-02 | 1.51E+13 | 2.85E+08 | 1.09E+02 | 5.42E+08 |
| Worst | 1.22E+03 | 2.78E+03 | 2.20E-02 | 3.29E+13 | 5.20E+08 | 1.98E+07 | 9.17E+08 |
| Mean | 6.02E+02 | 2.64E+03 | 1.81E-02 | 1.61E+13 | 2.99E+08 | 7.94E+05 | 5.84E+08 |
| Std | 4.11E+02 | 5.88E+01 | 3.08E-03 | 6.19E+12 | 9.31E+07 | 3.97E+06 | 1.68E+08 |
| DASA | Best | 9.30E-08 | 5.37E+01 | 2.82E-07 | 8.01E+11 | 5.03E+08 | 1.97E+07 | 1.23E+05 |
| Median | **1.73E-07** | **6.77E+01** | **4.41E-07** | 2.05E+12 | 7.45E+08 | 1.98E+07 | **1.73E+05** |
| Worst | 3.27E-07 | 9.75E+01 | 5.77E-07 | 4.29E+12 | 9.72E+08 | 1.99E+07 | 3.00E+05 |
| Mean | **1.86E-07** | **6.87E+01** | **4.34E-07** | 2.04E+12 | 7.52E+08 | 1.98E+07 | **1.81E+05** |
| Std | 6.15E-08 | 1.05E+01 | 8.39E-08 | 8.79E+11 | 1.22E+08 | 5.02E+04 | 4.46E+04 |
| EOEA | Best | 7.56E+01 | 5.05E+01 | 3.93E-03 | 4.06E+12 | 1.29E+07 | 2.99E+06 | 4.48E+06 |
| Median | 1.09E+02 | 8.51E+01 | 5.93E-03 | 7.78E+12 | **2.39E+07** | 3.97E+06 | 2.79E+07 |
| Worst | 9.49E+02 | 1.76E+02 | 1.45E-02 | 1.25E+13 | 3.08E+07 | 4.44E+06 | 1.54E+08 |
| Mean | 2.28E+02 | 9.10E+01 | 7.74E-03 | 7.75E+12 | **2.24E+07** | 3.85E+06 | 5.41E+07 |
| Std | 2.77E+02 | 3.67E+01 | 3.74E-03 | 2.60E+12 | 5.91E+06 | 4.97E+05 | 4.97E+07 |
| MA-SW-chains | Best | 8.52E+02 | 2.36E+03 | 3.44E+00 | 4.29E+11 | 3.68E+07 | 3.61E+00 | 6.33E+04 |
| Median | 1.55E+03 | 2.68E+03 | 3.83E+00 | **5.75E+11** | 2.59E+08 | 1.78E+01 | **7.78E+05** |
| Worst | 7.28E+03 | 2.97E+03 | 4.60E+00 | 7.42E+11 | 3.24E+08 | 1.16E+06 | 4.61E+06 |
| Mean | 2.24E+03 | 2.67E+03 | 3.84E+00 | **5.79E+11** | 2.17E+08 | 8.14E+04 | **8.35E+05** |
| Std | 1.71E+03 | 1.63E+02 | 2.13E-01 | 6.46E+10 | 8.56E+07 | 2.84E+05 | 9.08E+05 |
| DMS-PSO-SHS | Best | 1.18E-08 | 8.45E+02 | 2.54E-02 | 1.89E+12 | 7.15E+07 | 1.58E+01 | 1.03E+08 |
| Median | 1.39E-05 | 9.85E+02 | 2.95E-01 | 4.01E+12 | 7.42E+07 | 1.74E+01 | 1.17E+08 |
| Worst | 1.64E-04 | 1.64E+03 | 5.91E-01 | 7.21E+12 | 8.02E+08 | 1.88E+01 | 2.27E+08 |
| Mean | 1.00E-04 | 1.28E+03 | 3.72E-01 | 4.82E+12 | 7.66E+07 | 1.76E+01 | 1.21E+08 |
| Std | 1.16E-04 | 3.95E+02 | 3.57E-02 | 4.36E+11 | 1.49E+07 | 1.81E+00 | 2.42E+07 |
|  |  | F8 | F9 | F10 | F11 | F12 | F13 | F14 |
| ANDE | Best | 4.19E+07 | 2.49E+08 | 3.35E+03 | 5.59E+01 | 4.45E+05 | 3.02E+03 | 8.44E+08 |
| Median | 4.50E+07 | 2.63E+08 | 3.77E+03 | 9.79E+01 | 4.87E+05 | 4.56E+03 | 9.32E+08 |
| Worst | 1.48E+08 | 3.24E+08 | 4.38E+03 | 1.46E+02 | 5.51E+05 | 1.67E+04 | 1.03E+09 |
| Mean | 7.02E+07 | 2.71E+08 | 3.83E+03 | 1.01E+02 | 4.76E+05 | 5.30E+03 | 9.33E+08 |
| Std | 3.31E+07 | 2.22E+07 | 2.60E+02 | 2.78E+01 | 3.33E+04 | 3.26E+03 | 4.91E+07 |
| ANDE_1 | Best | 1.07E+00 | 3.79E+07 | 2.58E+03 | 1.23E+02 | 3.22E+04 | 5.62E+02 | 1.69E+08 |
| Median | **6.66E+02** | **4.54E+07** | 2.86E+03 | 1.31E+02 | 4.27E+04 | **1.13E+03** | 1.81E+08 |
| Worst | 3.98E+06 | 4.99E+07 | 2.97E+03 | 1.39E+02 | 6.24E+04 | 1.47E+03 | 1.95E+08 |
| Mean | **1.76E+05** | **4.49E+07** | 2.83E+03 | 1.32E+02 | 4.52E+04 | **1.14E+03** | 1.81E+08 |
| Std | 7.95E+05 | 3.78E+06 | 1.01E+02 | 4.81E+00 | 7.94E+03 | 2.50E+02 | 9.20E+06 |
| ANDE_2 | Best | 4.47E+07 | 2.82E+08 | 2.76E+03 | 2.49E+01 | 7.26E+05 | 3.24E+03 | 1.09E+09 |
| Median | 8.67E+07 | 3.36E+08 | 2.98E+03 | 6.56E+01 | 7.62E+05 | 7.35E+03 | 1.25E+09 |
| Worst | 1.48E+08 | 4.47E+08 | 3.27E+03 | 1.11E+02 | 8.87E+05 | 1.95E+04 | 1.37E+09 |
| Mean | 8.02E+07 | 3.42E+08 | 3.00E+03 | 6.60E+01 | 7.85E+05 | 7.78E+03 | 1.24E+09 |
| Std | 3.57E+07 | 4.29E+07 | 1.29E+02 | 3.10E+01 | 5.46E+04 | 4.88E+03 | 8.99E+07 |
| SDENS | Best | 4.64E+07 | 1.78E+09 | 1.02E+04 | 2.25E+02 | 1.25E+06 | 4.37E+05 | 3.91E+09 |
| Median | 6.40E+07 | 2.13E+09 | 1.09E+04 | 2.26E+02 | 1.30E+06 | 6.67E+05 | 5.02E+09 |
| Worst | 1.09E+08 | 2.88E+09 | 1.15E+04 | 2.26E+02 | 1.42E+06 | 7.64E+05 | 6.93E+09 |
| Mean | 7.41E+07 | 2.23E+09 | 1.10E+04 | 2.26E+02 | 1.32E+06 | 6.43E+05 | 5.14E+09 |
| Std | 2.73E+07 | 3.70E+08 | 4.59E+02 | 3.83E–01 | 5.98E+04 | 1.10E+05 | 9.89E+08 |
| jDElsgo | Best | 3.57E+07 | 1.45E+09 | 7.66E+03 | 7.73E+01 | 8.61E+05 | 2.90E+04 | 3.61E+09 |
| Median | 4.65E+07 | 1.64E+09 | 8.69E+03 | 1.14E+02 | 9.35E+05 | 4.95E+04 | 4.11E+09 |
| Worst | 1.39E+08 | 1.82E+09 | 9.49E+03 | 1.49E+02 | 9.88E+05 | 9.02E+04 | 4.72E+09 |
| Mean | 6.82E+07 | 1.66E+09 | 8.67E+03 | 1.17E+02 | 9.39E+05 | 5.32E+04 | 4.10E+09 |
| Std | 3.53E+07 | 8.29E+07 | 3.99E+02 | 1.87E+01 | 2.96E+04 | 1.70E+04 | 2.89E+08 |
| DECC-DML | Best | 4.19E+07 | 2.82E+08 | 1.25E+04 | 4.00E-01 | 3.64E+06 | 8.29E+02 | 9.82E+08 |
| Median | 1.15E+08 | 3.85E+08 | 1.30E+04 | **7.09E-01** | 4.22E+06 | 1.71E+03 | 1.18E+09 |
| Worst | 2.38E+08 | 4.21E+08 | 1.36E+04 | 1.72E+00 | 4.65E+06 | 1.47E+04 | 1.29E+09 |
| Mean | 1.24E+08 | 3.73E+08 | 1.30E+04 | **7.66E-01** | 4.19E+06 | 3.15E+03 | 1.17E+09 |
| Std | 5.40E+07 | 3.13E+07 | 2.93E+02 | 2.81E-01 | 2.18E+05 | 3.09E+03 | 8.20E+07 |
| DASA | Best | 1.49E+05 | 1.34E+08 | 6.81E+03 | 1.98E+02 | 1.06E+05 | 1.58E+03 | 4.23E+08 |
| Median | 3.54E+07 | 1.62E+08 | 7.71E+03 | 1.99E+02 | 1.27E+05 | 1.35E+04 | 4.89E+08 |
| Worst | 3.77E+08 | 2.17E+08 | 8.43E+03 | 1.99E+02 | 1.51E+05 | 2.50E+04 | 5.78E+08 |
| Mean | 7.69E+07 | 1.62E+08 | 7.66E+03 | 1.99E+02 | 1.28E+05 | 1.39E+04 | 4.96E+08 |
| Std | 9.40E+07 | 2.06E+07 | 4.56E+02 | 2.27E-01 | 1.03E+04 | 5.79E+03 | 3.62E+07 |
| EOEA | Best | 3.24E+05 | 1.65E+08 | 1.02E+03 | 2.92E+01 | 1.89E+05 | 1.64E+03 | 6.37E+08 |
| Median | 1.34E+07 | 2.37E+08 | **1.12E+03** | 3.19E+01 | 2.55E+05 | 2.58E+03 | 7.53E+08 |
| Worst | 4.53E+07 | 2.54E+08 | 1.25E+03 | 8.14E+01 | 2.99E+05 | 5.31E+03 | 9.64E+08 |
| Mean | 1.45E+07 | 2.24E+08 | **1.13E+03** | 4.03E+01 | 2.48E+05 | 2.83E+03 | 7.79E+08 |
| Std | 1.39E+07 | 3.01E+07 | 6.54E+01 | 1.68E+01 | 3.24E+04 | 1.16E+03 | 8.32E+07 |
| MA-SW-chains | Best | 3.42E+06 | 6.93E+07 | 2.79E+03 | 2.77E+01 | 1.39E+03 | 1.08E+03 | 1.51E+08 |
| Median | 1.90E+07 | 8.08E+07 | 3.25E+03 | 3.79E+01 | **1.64E+03** | 3.06E+03 | **1.70E+08** |
| Worst | 6.11E+08 | 1.00E+08 | 3.54E+03 | 5.15E+01 | 1.91E+03 | 1.07E+04 | 1.95E+08 |
| Mean | 6.13E+07 | 8.18E+07 | 3.22E+03 | 3.83E+01 | **1.63E+03** | 4.34E+03 | **1.69E+08** |
| Std | 1.27E+08 | 8.36E+06 | 1.85E+02 | 7.23E+00 | 1.53E+02 | 3.21E+03 | 1.17E+07 |
| DMS-PSO-SHS | Best | 3.74E+07 | 1.11E+08 | 5.10E+03 | 7.01E+01 | 1.56E+05 | 1.10E+03 | 3.18E+08 |
| Median | 4.01E+07 | 1.52E+08 | 5.51E+03 | 8.00E+01 | 1.87E+05 | 5.42E+03 | 5.23E+08 |
| Worst | 1.35E+08 | 2.05E+08 | 6.29E+03 | 1.07E+02 | 3.82E+05 | 8.69E+03 | 7.14E+08 |
| Mean | 6.05E+07 | 1.69E+08 | 5.64E+03 | 8.19E+01 | 2.13E+05 | 5.81E+03 | 6.08E+08 |
| Std | 4.22E+06 | 1.15E+07 | 7.15E+02 | 1.06E+01 | 2.13E+04 | 7.98E+02 | 2.45E+07 |
|  |  | F15 | F16 | F17 | F18 | F19 | F20 |  |
| ANDE | Best | 4.18E+03 | 3.14E+02 | 9.29E+05 | 5.60E+04 | 3.49E+06 | 5.79E+04 |  |
| Median | 4.36E+03 | 3.59E+02 | 9.93E+05 | 193E+05 | 3.83E+06 | 1.20E+05 |  |
| Worst | 4.67E+03 | 3.82E+02 | 1.06E+06 | 3.42E+05 | 4.37E+06 | 3.89E+05 |  |
| Mean | 4.38E+03 | 3.58E+02 | 9.87E+05 | 1.93E+05 | 3.91E+06 | 1.45E+05 |  |
| Std | 1.38E+02 | 2.02E+01 | 4.20E+04 | 7.75E+04 | 2.40E+05 | 9.03E+04 |  |
| ANDE_1 | Best | 4.92E+03 | 3.35E+02 | 8.36E+05 | 4.93E+05 | 3.11E+06 | 1.44E+06 |  |
| Median | 5.27E+03 | 3.65E+02 | 9.04E+05 | 4.90E+06 | 3.42E+06 | 3.23E+06 |  |
| Worst | 5.67E+03 | 3.91E+02 | 9.63E+05 | 4.02E+07 | 3.73E+06 | 5.60E+07 |  |
| Mean | 5.27E+03 | 3.62E+02 | 8.95E+05 | 9.23E+06 | 3.41E+06 | 8.30E+06 |  |
| Std | 2.05E+02 | 1.65E+01 | 4.21E+04 | 1.11E+07 | 2.09E+05 | 1.40E+07 |  |
| ANDE_2 | Best | 3.96E+03 | 2.54E+02 | 1.28E+06 | 9.38E+04 | 5.67E+06 | 4.52E+04 |  |
| Median | 4.40E+03 | 3.11E+02 | 1.40E+06 | 5.18E+06 | 7.58E+06 | 1.36E+07 |  |
| Worst | 9.26E+03 | 3.28E+02 | 1.57E+06 | 2.84E+08 | 1.04E+07 | 2.49E+08 |  |
| Mean | 4.74E+03 | 3.03E+02 | 1.41E+06 | 3.25E+07 | 8.07E+06 | 3.00E+07 |  |
| Std | 1.29E+03 | 2.46E+01 | 8.81E+04 | 7.19E+07 | 1.38E+06 | 6.23E+07 |  |
| SDENS | Best | 7.32E+03 | 4.13E+02 | 1.96E+06 | 1.65E+08 | 4.92E+06 | 1.36E+08 |  |
| Median | 1.18E+04 | 4.13E+02 | 2.02E+06 | 1.86E+08 | 5.39E+06 | 2.78E+08 |  |
| Worst | 1.26E+04 | 4.14E+02 | 2.29E+06 | 3.00E+08 | 6.18E+06 | 3.52E+08 |  |
| Mean | 1.03E+04 | 4.13E+02 | 2.07E+06 | 2.02E+08 | 5.41E+06 | 2.69E+08 |  |
| Std | 2.29E+03 | 3.49E–01 | 1.17E+05 | 5.02E+07 | 4.31E+05 | 7.57E+07 |  |
| jDElsgo | Best | 1.10E+04 | 2.67E+02 | 1.81E+06 | 6.95E+05 | 4.16E+06 | 5.98E+05 |  |
| Median | 1.22E+04 | 2.97E+02 | 1.97E+06 | 1.04E+06 | 5.48E+06 | 1.05E+06 |  |
| Worst | 1.26E+04 | 3.53E+02 | 2.10E+06 | 1.39E+06 | 1.22E+07 | 1.66E+06 |  |
| Mean | 1.20E+04 | 2.99E+02 | 1.95E+06 | 1.03E+06 | 6.09E+06 | 1.01E+06 |  |
| Std | 5.30E+02 | 1.91E+01 | 6.54E+04 | 2.08E+05 | 1.65E+06 | 2.48E+05 |  |
| DECC-DML | Best | 1.53E+04 | 3.46E+00 | 6.50E+06 | 5.64E+03 | 1.54E+07 | 1.43E+03 |  |
| Median | 1.59E+04 | **8.65E+00** | 7.29E+06 | 1.48E+04 | 1.84E+07 | 1.67E+03 |  |
| Worst | 1.67E+04 | 4.28E+02 | 7.99E+06 | 3.96E+04 | 2.46E+07 | 2.02E+03 |  |
| Mean | 1.59E+04 | **4.47E+01** | 7.27E+06 | 1.74E+04 | 1.87E+07 | 1.69E+03 |  |
| Std | 3.63E+02 | 1.16E+02 | 3.77E+05 | 8.26E+03 | 1.99E+06 | 1.58E+02 |  |
| DASA | Best | 1.40E+04 | 3.97E+02 | 3.49E+05 | 1.93E+04 | 2.28E+06 | 1.60E+03 |  |
| Median | 1.51E+04 | 3.97E+02 | 3.77E+05 | 4.20E+04 | 2.64E+06 | 2.11E+03 |  |
| Worst | 1.60E+04 | 3.98E+02 | 4.11E+05 | 6.53E+04 | 2.90E+06 | 4.02E+03 |  |
| Mean | 1.51E+04 | 3.97E+02 | 3.82E+05 | 4.30E+04 | 2.63E+06 | 2.17E+03 |  |
| Std | 5.08E+02 | 2.57E-01 | 1.99E+04 | 1.35E+04 | 1.27E+05 | 5.68E+02 |  |
| EOEA | Best | 1.97E+03 | 6.58E+01 | 5.57E+05 | 1.80E+04 | 5.04E+06 | 3.85E+03 |  |
| Median | **2.13E+03** | 7.85E+01 | 7.14E+05 | 5.00E+04 | 5.50E+06 | 4.48E+03 |  |
| Worst | 2.33E+03 | 1.19E+02 | 8.35E+05 | 6.55E+04 | 6.42E+06 | 5.16E+03 |  |
| Mean | **2.14E+03** | 8.33E+01 | 7.08E+05 | 4.80E+04 | 5.56E+06 | 4.42E+03 |  |
| Std | 1.22E+02 | 1.71E+01 | 7.69E+04 | 1.35E+04 | 3.98E+05 | 4.09E+02 |  |
| MA-SW-chains | Best | 2.95E+03 | 8.51E+01 | 3.59E+04 | 1.80E+03 | 1.29E+06 | 1.02E+03 |  |
| Median | 3.19E+03 | 9.71E+01 | **4.29E+04** | **3.89E+03** | **1.42E+06** | **1.18E+03** |  |
| Worst | 3.45E+03 | 1.26E+02 | 5.01E+04 | 1.61E+04 | 1.58E+06 | 1.65E+03 |  |
| Mean | 3.19E+03 | 1.02E+02 | **4.31E+04** | **5.53E+03** | **1.41E+06** | **1.21E+03** |  |
| Std | 1.46E+02 | 1.42E+01 | 3.42E+03 | 3.94E+03 | 7.44E+04 | 1.42E+02 |  |
| DMS-PSO-SHS | Best | 9.56E+02 | 8.87E+01 | 2.34E+05 | 9.52E+03 | 6.73E+06 | 8.97E+02 |  |
| Median | 5.12E+03 | 9.06E+01 | 4.44E+05 | 5.75E+04 | 7.83E+06 | 2.88E+03 |  |
| Worst | 8.53E+03 | 2.68E+02 | 5.76E+05 | 8.06E+04 | 8.43E+06 | 4.65E+03 |  |
| Mean | 5.82E+03 | 9.94E+01 | 4.79E+05 | 6.79E+04 | 7.91E+06 | 3.05E+03 |  |
| Std | 8.46E+02 | 6.01E+00 | 3.25E+04 | 8.15E+03 | 5.15E+05 | 4.23E+02 |  |

**Table S6** Experimental Comparisons between ANDE and state-of-the-art algorithms, FES= 3.00E+6

|  |  | F1 | F2 | F3 | F4 | F5 | F6 | F7 |
| --- | --- | --- | --- | --- | --- | --- | --- | --- |
| ANDE | Best | 0.00E+00 | 3.45E+02 | 7.46E-14 | 2.92E+11 | 6.66E+07 | 1.54E+01 | 2.91E-01 |
| Median | **0.00E+00** | 3.74E+02 | **7.46E-14** | 4.82E+11 | 8.75E+07 | 1.72E+01 | 1.33E+00 |
| Worst | 2.47E-25 | 4.00E+02 | 7.46E-14 | 7.60E+11 | 1.23E+08 | 1.75E+01 | 5.44E+00 |
| Mean | **3.72E-26** | 3.72E+02 | **7.46E-14** | 5.13E+11 | 9.19E+07 | 1.64E+00 | 1.80E+00 |
| Std | 7.23E-26 | 1.79E+01 | 0.00E+00 | 1.49E+11 | 1.61E+07 | 6.72E-01 | 1.51E+00 |
| ANDE_1 | Best | 1.58E-21 | 5.58E+02 | 9.23E-14 | 9.79E+10 | 5.17E+07 | 1.63E+01 | 5.88E-01 |
| Median | 1.71E-21 | 6.08E+02 | 9.23E-14 | 1.56E+11 | 7.36E+07 | 1.81E+01 | 1.72E+00 |
| Worst | 1.81E-21 | 6.50E+02 | 9.94E-14 | 4.44E+11 | 1.13E+08 | 1.89E+01 | 2.42E+01 |
| Mean | 1.70E-21 | 6.07E+02 | 9.33E-14 | 2.23E+11 | 7.44E+07 | 1.79E+01 | 5.03E+00 |
| Std | 1.08E-22 | 2.81E+01 | 2.50E-15 | 1.19E+11 | 2.01E+07 | 8.18E-01 | 7.34E+00 |
| ANDE_2 | Best | 0.00E+00 | 3.25E+02 | 7.81E-14 | 7.54E+11 | 8.42E+07 | 1.47E+01 | 9.71E+02 |
| Median | 1.79E-24 | 3.53E+02 | 8.52E-14 | 1.35E+12 | 1.09E+08 | 1.56E+01 | 6.63E+03 |
| Worst | 2.58E-23 | 3.82E+02 | 8.52E-14 | 2.66E+12 | 1.82E+08 | 1.65E+01 | 1.86E+04 |
| Mean | 4.96E-24 | 3.51E+02 | 8.42E-14 | 1.46E+12 | 1.19E+08 | 1.57E+01 | 8.58E+03 |
| Std | 7.69E-24 | 1.81E+01 | 2.29E-15 | 4.83E+11 | 3.20E+07 | 5.14E-01 | 5.51E+03 |
| SDENS | Best | 1.75E–06 | 2.14E+03 | 1.23E–05 | 3.26E+12 | 7.66E+07 | 1.53E–04 | 6.36E+07 |
| Median | 2.54E–06 | 2.17E+03 | 2.35E–05 | 3.72E+12 | 1.17E+08 | 1.76E–04 | 8.57E+07 |
| Worst | 1.16E–05 | 2.39E+03 | 5.50E–05 | 8.99E+12 | 1.52E+08 | 2.57E–04 | 2.39E+08 |
| Mean | 5.73E–06 | 2.21E+03 | 2.70E–05 | 5.11E+12 | 1.18E+08 | 2.02E–04 | 1.20E+08 |
| Std | 4.46E–06 | 8.95E+01 | 1.54E–05 | 2.16E+12 | 2.88E+07 | 4.29E–05 | 6.56E+07 |
| jDElsgo | Best | 4.78E-20 | 1.09E-11 | 1.63E-12 | 3.09E+10 | 7.42E+07 | 7.14E-09 | 2.69E-05 |
| Median | 6.63E-20 | **4.69E-11** | 2.35E-12 | **8.28E+10** | 9.82E+07 | **7.22E-09** | **1.04E-04** |
| Worst | 2.24E-19 | 1.12E+00 | 2.24E-11 | 1.34E+11 | 1.24E+08 | 2.10E-07 | 3.19E-01 |
| Mean | 8.86E-20 | **1.25E-01** | 3.81E-12 | **8.06E+10** | 9.72E+07 | **1.70E-08** | **1.31E-02** |
| Std | 4.51E-20 | 3.45E-01 | 5.02E-12 | 3.08E+10 | 1.44E+07 | 4.03E-08 | 6.38E-02 |
| DECC-DML | Best | 9.05E-27 | 1.62E+02 | 1.10E-13 | 1.38E+12 | 1.42E+08 | 3.55E-09 | 7.09E+07 |
| Median | 1.22E-25 | 2.12E+02 | 1.14E-13 | 3.32E+12 | 2.85E+08 | 7.11E-09 | 1.23E+08 |
| Worst | 7.12E-25 | 2.94E+02 | 1.35E-13 | 6.89E+12 | 5.20E+08 | 1.98E+07 | 4.82E+08 |
| Mean | 1.93E-25 | 2.17E+02 | 1.18E-13 | 3.58E+12 | 2.99E+08 | 7.93E+05 | 1.39E+08 |
| Std | 1.86E-25 | 2.98E+01 | 8.22E-15 | 1.54E+12 | 9.31E+07 | 3.97E+06 | 7.72E+07 |
| DASA | Best | 5.59E-23 | 3.98E+00 | 5.54E-11 | 2.26E+11 | 4.41E+08 | 1.96E+07 | 2.57E+00 |
| Median | 5.42E-22 | 7.96E+00 | 7.37E-11 | 4.94E+11 | 6.36E+08 | 1.97E+07 | 7.18E+00 |
| Worst | 8.44E-21 | 1.29E+01 | 8.56E-11 | 1.10E+12 | 7.45E+08 | 1.98E+07 | 1.49E+01 |
| Mean | 1.52E-21 | 8.48E+00 | 7.20E-11 | 5.05E+11 | 6.20E+08 | 1.97E+07 | 7.78E+00 |
| Std | 2.33E-21 | 2.52E+00 | 8.27E-12 | 2.22E+11 | 7.87E+07 | 4.45E+04 | 3.10E+00 |
| EOEA | Best | 0.00E+00 | 3.55E-15 | 1.53E-13 | 1.25E+12 | 1.29E+07 | 2.99E+06 | 3.99E+00 |
| Median | 1.35E-24 | 1.78E-14 | 1.71E-13 | 2.57E+12 | **2.39E+07** | 3.97E+06 | 5.49E+01 |
| Worst | 7.95E-23 | 1.99E+00 | 1.81E-13 | 5.96E+12 | 3.08E+07 | 4.44E+06 | 5.27E+02 |
| Mean | 2.20E-23 | 3.62E-01 | 1.67E-13 | 3.09E+12 | **2.24E+07** | 3.85E+06 | 1.24E+02 |
| Std | 2.87E-23 | 6.71E-01 | 1.13E-14 | 1.61E+12 | 5.91E+06 | 4.97E+05 | 1.55E+02 |
| MA-SW-chains | Best | 3.18E-15 | 7.04E+02 | 3.34E-13 | 3.04E+11 | 2.89E+07 | 8.13E-07 | 3.35E-03 |
| Median | 1.50E-14 | 7.90E+02 | 6.11E-13 | 3.54E+11 | 2.31E+08 | 1.60E+00 | 9.04E+01 |
| Worst | 8.15E-14 | 9.37E+02 | 1.58E-12 | 3.97E+11 | 2.90E+08 | 1.16E+06 | 2.68E+02 |
| Mean | 2.10E-14 | 8.10E+02 | 7.28E-13 | 3.53E+11 | 1.68E+08 | 8.14E+04 | 1.03E+02 |
| Std | 1.99E-14 | 5.88E+01 | 3.40E-13 | 3.12E+10 | 1.04E+08 | 2.84E+05 | 8.70E+01 |
| DMS-PSO-SHS | Best | 5.20E-25 | 1.39E+01 | 4.69E-14 | 1.25E+11 | 2.02E+07 | 5.83E-12 | 9.29E+02 |
| Median | 2.61E-19 | 7.16E+01 | 1.28E-12 | 2.04E+11 | 6.10E+07 | 5.84E-05 | 1.34E+03 |
| Worst | 1.01E-14 | 1.05E+02 | 5.10E-10 | 6.64E+11 | 1.12E+08 | 1.51E+01 | 3.91E+03 |
| Mean | 5.51E-15 | 8.51E+01 | 5.52E-11 | 2.46E+11 | 8.36E+07 | 8.28E-02 | 1.95E+03 |
| Std | 4.00E-14 | 2.06E+01 | 3.25E-10 | 3.31E+10 | 6.10E+06 | 9.96E-01 | 1.56E+02 |
|  |  | F8 | F9 | F10 | F11 | F12 | F13 | F14 |
| ANDE | Best | 9.69E+05 | 3.32E+07 | 2.89E+03 | 5.74E+01 | 3.88E+04 | 8.11E+02 | 1.79E+08 |
| Median | 1.08E+07 | 4.14E+07 | 3.06E+03 | 8.84E+01 | 4.89E+04 | 1.07E+03 | 1.86E+08 |
| Worst | 7.04E+07 | 5.03E+07 | 3.27E+03 | 1.13E+02 | 6.45E+04 | 1.69E+03 | 2.00E+08 |
| Mean | 1.25E+07 | 4.12E+07 | 3.06E+03 | 8.95E+01 | 4.89E+04 | 1.11E+03 | 1.87E+08 |
| Std | 2.53E+07 | 4.90E+06 | 1.30E+02 | 1.91E+01 | 6.04E+03 | 2.37E+02 | 7.01E+06 |
| ANDE_1 | Best | 1.07E+00 | 3.79E+07 | 2.58E+03 | 1.23E+02 | 3.22E+04 | 5.62E+02 | 1.69E+08 |
| Median | **6.66E+02** | 4.54E+07 | 2.86E+03 | 1.31E+02 | 4.27E+04 | 1.13E+03 | 1.81E+08 |
| Worst | 3.98E+06 | 4.99E+07 | 2.97E+03 | 1.39E+02 | 6.24E+04 | 1.47E+03 | 1.95E+08 |
| Mean | **1.76E+05** | 4.49E+07 | 2.83E+03 | 1.32E+02 | 4.52E+04 | 1.14E+03 | 1.81E+08 |
| Std | 7.95E+05 | 3.78E+06 | 1.01E+02 | 4.81E+00 | 7.94E+03 | 2.50E+02 | 9.20E+06 |
| ANDE_2 | Best | 3.56E+07 | 5.23E+07 | 2.17E+03 | 7.72E+01 | 7.41E+04 | 9.66E+02 | 2.11E+08 |
| Median | 4.02E+07 | 6.06E+07 | 2.36E+03 | 9.62E+01 | 8.48E+04 | 1.44E+03 | 2.51E+08 |
| Worst | 9.86E+07 | 6.95E+07 | 2.70E+03 | 1.15E+02 | 9.69E+04 | 2.75E+03 | 2.75E+08 |
| Mean | 6.39E+07 | 6.16E+07 | 2.38E+03 | 9.54E+01 | 8.48E+04 | 1.63E+03 | 2.48E+08 |
| Std | 2.83E+07 | 5.04E+06 | 1.39E+02 | 8.85E+00 | 7.75E+03 | 5.27E+02 | 1.76E+07 |
| SDENS | Best | 3.96E+07 | 4.77E+08 | 5.78E+03 | 2.20E+02 | 3.80E+05 | 1.16E+03 | 1.61E+09 |
| Median | 4.09E+07 | 5.75E+08 | 7.03E+03 | 2.21E+02 | 3.95E+05 | 1.80E+03 | 1.86E+09 |
| Worst | 9.35E+07 | 6.38E+08 | 7.37E+03 | 2.22E+02 | 4.97E+05 | 4.13E+03 | 2.30E+09 |
| Mean | 5.12E+07 | 5.63E+08 | 6.87E+03 | 2.21E+02 | 4.13E+05 | 2.19E+03 | 1.88E+09 |
| Std | 2.12E+07 | 5.78E+07 | 5.60E+02 | 5.09E–01 | 4.28E+04 | 1.03E+03 | 2.33E+08 |
| jDElsgo | Best | 3.40E-03 | 2.36E+07 | 2.10E+03 | 1.27E+00 | 8.32E+03 | 4.79E+02 | 1.28E+08 |
| Median | 1.25E+06 | 3.04E+07 | 2.66E+03 | 1.95E+01 | 1.18E+04 | **6.91E+02** | 1.72E+08 |
| Worst | 8.08E+06 | 4.22E+07 | 3.30E+03 | 5.81E+01 | 1.71E+04 | 1.02E+03 | 2.02E+08 |
| Mean | 3.15E+06 | 3.11E+07 | 2.64E+03 | 2.20E+01 | 1.21E+04 | **7.11E+02** | 1.69E+08 |
| Std | 3.27E+06 | 5.00E+06 | 3.19E+02 | 1.53E+01 | 2.04E+03 | 1.37E+02 | 2.08E+07 |
| DECC-DML | Best | 7.34E+05 | 4.51E+07 | 1.21E+04 | 1.63E-13 | 3.46E+06 | 6.19E+02 | 1.54E+08 |
| Median | 1.57E+07 | 5.97E+07 | 1.24E+04 | **1.78E-13** | 3.81E+06 | 1.06E+03 | 1.89E+08 |
| Worst | 1.21E+08 | 7.09E+07 | 1.30E+04 | 2.03E-13 | 4.11E+06 | 2.09E+03 | 2.22E+08 |
| Mean | 3.46E+07 | 5.92E+07 | 1.25E+04 | **1.80E-13** | 3.80E+06 | 1.14E+03 | 1.89E+08 |
| Std | 3.56E+07 | 4.71E+06 | 2.66E+02 | 9.88E-15 | 1.50E+05 | 4.31E+02 | 1.49E+07 |
| DASA | Best | 2.84E+03 | 2.83E+07 | 6.78E+03 | 1.98E+02 | 1.40E+03 | 5.16E+02 | 8.35E+07 |
| Median | 1.21E+06 | 3.58E+07 | 7.33E+03 | 1.98E+02 | 1.75E+03 | 9.72E+02 | 1.00E+08 |
| Worst | 3.48E+08 | 5.18E+07 | 7.75E+03 | 1.99E+02 | 2.22E+03 | 3.65E+03 | 1.14E+08 |
| Mean | 4.98E+07 | 3.60E+07 | 7.29E+03 | 1.98E+02 | 1.78E+03 | 1.21E+03 | 1.00E+08 |
| Std | 8.95E+07 | 4.78E+06 | 2.69E+02 | 1.57E-01 | 2.25E+02 | 7.39E+02 | 7.88E+06 |
| EOEA | Best | 9.50E+01 | 3.75E+07 | 9.50E+02 | 2.68E+01 | 9.57E+03 | 7.98E+02 | 1.55E+08 |
| Median | 5.51E+06 | 4.74E+07 | **1.07E+03** | 3.03E+01 | 1.35E+04 | 1.12E+03 | 1.63E+08 |
| Worst | 4.07E+07 | 5.31E+07 | 1.18E+03 | 7.87E+01 | 1.99E+04 | 2.27E+03 | 1.85E+08 |
| Mean | 1.01E+07 | 4.63E+07 | **1.08E+03** | 3.86E+01 | 1.37E+04 | 1.24E+03 | 1.65E+08 |
| Std | 1.28E+07 | 4.78E+06 | 6.91E+01 | 1.65E+01 | 2.90E+03 | 4.59E+02 | 8.95E+06 |
| MA-SW-chains | Best | 1.54E+06 | 1.19E+07 | 1.81E+03 | 2.74E+01 | 2.65E-06 | 3.86E+02 | 2.79E+07 |
| Median | 3.43E+06 | 1.40E+07 | 2.07E+03 | 3.75E+01 | **3.50E-06** | 1.07E+03 | **3.09E+07** |
| Worst | 1.80E+08 | 1.62E+07 | 2.28E+03 | 5.11E+01 | 4.98E-06 | 2.92E+03 | 3.67E+07 |
| Mean | 1.41E+07 | 1.41E+07 | 2.07E+03 | 3.80E+01 | **3.62E-06** | 1.25E+03 | **3.11E+07** |
| Std | 3.68E+07 | 1.15E+06 | 1.44E+02 | 7.35E+00 | 5.92E-07 | 5.72E+02 | 1.93E+06 |
| DMS-PSO-SHS | Best | 2.74E+03 | 3.58E+06 | 4.95E+03 | 1.76E+01 | 3.50E+02 | 5.95E+02 | 8.97E+06 |
| Median | 1.03E+07 | **7.34E+06** | 5.26E+03 | 3.48E+01 | 6.02E+02 | 1.01E+03 | 1.67E+07 |
| Worst | 1.15E+08 | 1.04E+07 | 6.01E+03 | 7.02E+01 | 7.28E+02 | 2.56E+03 | 1.93E+07 |
| Mean | 1.29E+07 | **8.72E+06** | 5.53E+03 | 3.25E+01 | 6.13E+02 | 1.12E+03 | 1.76E+07 |
| Std | 1.91E+06 | 6.51E+05 | 5.18E+02 | 3.00E+00 | 6.00E+01 | 1.05E+02 | 1.55E+06 |
|  |  | F15 | F16 | F17 | F18 | F19 | F20 |  |
| ANDE | Best | 2.92E+03 | 2.86E+02 | 1.93E+05 | 1.94E+03 | 1.53E+06 | 1.94E+03 |  |
| Median | 3.23E+03 | 3.05E+02 | 2.01E+05 | 2.41E+03 | 1.61E+06 | 2.20E+03 |  |
| Worst | 3.35E+03 | 3.15E+02 | 2.21E+05 | 2.70E+03 | 1.79E+06 | 2.58E+03 |  |
| Mean | 3.19E+03 | 3.04E+02 | 2.02E+05 | 2.35E+03 | 1.63E+06 | 2.20E+03 |  |
| Std | 1.26E+03 | 7.69E+00 | 1.00E+04 | 2.26E+02 | 8.36E+04 | 1.63E+02 |  |
| ANDE_1 | Best | 3.29E+03 | 3.08E+02 | 1.74E+05 | 2.08E+03 | 1.26E+06 | 2.00E+03 |  |
| Median | 3.46E+03 | 3.17E+02 | 1.90E+05 | 2.55E+03 | 1.34E+06 | 2.44E+03 |  |
| Worst | 3.65E+03 | 3.36E+02 | 2.01E+05 | 4.34E+03 | 1.47E+06 | 2.89E+03 |  |
| Mean | 3.44E+03 | 3.18E+02 | 1.89E+05 | 2.61E+03 | 1.36E+06 | 2.43E+03 |  |
| Std | 1.01E+02 | 6.96E+00 | 8.98E+03 | 5.52E+02 | 6.77E+04 | 1.96E+02 |  |
| ANDE_2 | Best | 2.77E+03 | 2.57E+02 | 3.11E+05 | 2.85E+03 | 1.86E+06 | 1.59E+03 |  |
| Median | 3.11E+03 | 2.77E+02 | 3.33E+05 | 6.29E+03 | 2.09E+06 | 2.00E+03 |  |
| Worst | 3.27E+03 | 2.86E+02 | 3.95E+05 | 3.31E+04 | 2.37E+06 | 2.18E+03 |  |
| Mean | 3.06E+03 | 2.75E+02 | 3.41E+05 | 1.08E+04 | 2.13E+06 | 1.96E+03 |  |
| Std | 1.51E+02 | 9.15E+00 | 2.86E+04 | 9.093+03 | 1.54E+05 | 1.62E+02 |  |
| SDENS | Best | 7.14E+03 | 4.03E+02 | 8.78E+05 | 1.16E+04 | 7.57E+05 | 9.81E+02 |  |
| Median | 7.32E+03 | 4.09E+02 | 1.14E+06 | 3.32E+04 | 8.02E+05 | 9.83E+02 |  |
| Worst | 7.44E+03 | 4.10E+02 | 1.18E+06 | 4.51E+04 | 1.19E+06 | 1.02E+03 |  |
| Mean | 7.32E+03 | 4.08E+02 | 1.08E+06 | 3.08E+04 | 8.80E+05 | 9.90E+02 |  |
| Std | 9.63E+01 | 2.53E+00 | 1.11E+05 | 1.22E+04 | 1.59E+05 | 1.62E+01 |  |
| jDElsgo | Best | 5.20E+03 | 7.30E+01 | 7.75E+04 | 1.31E+03 | 2.39E+05 | 1.24E+03 |  |
| Median | 5.78E+03 | 1.46E+02 | 1.00E+05 | 1.88E+03 | **2.77E+05** | 1.55E+03 |  |
| Worst | 6.84E+03 | 2.00E+02 | 1.28E+05 | 2.57E+03 | 3.21E+05 | 1.83E+03 |  |
| Mean | 5.84E+03 | 1.44E+02 | 1.02E+05 | 1.85E+03 | **2.74E+05** | 1.53E+03 |  |
| Std | 4.48E+02 | 3.43E+01 | 1.26E+04 | 3.18E+02 | 2.12E+04 | 1.32E+02 |  |
| DECC-DML | Best | 1.48E+04 | 2.74E-13 | 5.65E+06 | 1.64E+03 | 1.30E+07 | 9.69E+02 |  |
| Median | 1.53E+04 | **3.20E-13** | 6.55E+06 | 2.21E+03 | 1.59E+07 | 9.75E+02 |  |
| Worst | 1.62E+04 | 1.27E+00 | 7.63E+06 | 7.52E+03 | 2.16E+07 | 1.10E+03 |  |
| Mean | 1.54E+04 | **5.08E-02** | 6.54E+06 | 2.47E+03 | 1.59E+07 | 9.91E+02 |  |
| Std | 3.59E+02 | 2.54E-01 | 4.63E+05 | 1.18E+03 | 1.72E+06 | 3.51E+01 |  |
| DASA | Best | 1.38E+04 | 3.96E+02 | 8.52E+03 | 2.37E+03 | 7.18E+05 | 7.75E+02 |  |
| Median | 1.45E+04 | 3.97E+02 | 1.03E+04 | 3.95E+03 | 8.28E+05 | 1.19E+03 |  |
| Worst | 1.51E+04 | 3.97E+02 | 1.23E+04 | 1.09E+04 | 9.43E+05 | 1.49E+03 |  |
| Mean | 1.45E+04 | 3.97E+02 | 1.03E+04 | 4.92E+03 | 8.34E+05 | 1.13E+03 |  |
| Std | 3.69E+02 | 2.18E-01 | 8.99E+02 | 2.28E+03 | 5.26E+04 | 1.79E+02 |  |
| EOEA | Best | 1.97E+03 | 6.57E+01 | 6.29E+04 | 1.99E+03 | 1.69E+06 | 1.65E+03 |  |
| Median | 2.13E+03 | 7.85E+01 | 8.12E+04 | 2.89E+03 | 1.82E+06 | 1.96E+03 |  |
| Worst | 2.33E+03 | 1.17E+02 | 9.61E+04 | 4.10E+03 | 2.02E+06 | 2.34E+03 |  |
| Mean | 2.14E+03 | 8.26E+01 | 7.93E+04 | 2.94E+03 | 1.84E+06 | 1.97E+03 |  |
| Std | 1.22E+02 | 1.68E+01 | 8.80E+03 | 6.92E+02 | 9.97E+04 | 2.35E+02 |  |
| MA-SW-chains | Best | 2.56E+03 | 8.51E+01 | 1.04E+00 | 7.83E+02 | 2.49E+05 | 9.25E+02 |  |
| Median | **2.72E+03** | 9.44E+01 | **1.26E+00** | **1.19E+03** | 2.85E+05 | 1.06E+03 |  |
| Worst | 2.96E+03 | 1.24E+02 | 1.63E+00 | 2.55E+03 | 3.32E+05 | 1.21E+03 |  |
| Mean | **2.74E+03** | 9.98E+01 | **1.24E+00** | **1.30E+03** | 2.85E+05 | 1.07E+03 |  |
| Std | 1.22E+02 | 1.40E+01 | 1.25E-01 | 4.36E+02 | 1.78E+04 | 7.29E+01 |  |
| DMS-PSO-SHS | Best | 9.25E+02 | 3.67E+01 | 6.57E+02 | 1.92E+03 | 1.00E+06 | 9.26E+01 |  |
| Median | 4.01E+03 | 6.49E+01 | 1.14E+03 | 2.04E+03 | 1.10E+06 | **2.84E+02** |  |
| Worst | 5.17E+03 | 8.31E+01 | 1.25E+04 | 4.11E+03 | 1.51E+06 | 6.21E+02 |  |
| Mean | 4.08E+03 | 6.97E+01 | 3.83E+03 | 2.26E+03 | 1.17E+06 | **3.52E+02** |  |
| Std | 2.17E+02 | 4.24E+00 | 4.15E+02 | 1.16E+02 | 1.06E+05 | 4.02E+01 |  |

**Table S7** Experimental Comparisons between ANDE, ANDE*CR*=0.1, ANDE*CR*=0.5 and ANDE*CR*=0.9 algorithms, FES= 6.0E5

|  |  | *F*1 | *F*2 | *F*3 | *F*4 | *F*5 | *F*6 | *F*7 |
| --- | --- | --- | --- | --- | --- | --- | --- | --- |
| ANDE | Best | - | - | - | 1.65E+12 | 6.36E+07 | 2.47E+00 | 8.41E+05 |
| Median | - | - | - | **2.54E+12** | **8.15E+07** | 4.79E+00 | **1.45E+06** |
| Worst | - | - | - | 3.16E+12 | 1.04E+08 | 6.38E+00 | 2.82E+06 |
| Mean | - | - | - | **2.44E+12** | **8.30E+07** | 4.39E+00 | **1.53E+06** |
| Std | - | - | - | 4.23E+11 | 1.29E+07 | 1.44E+00 | 2.82E+05 |
| ANDE*CR*=0.1 | Best | - | - | - | 7.68E+13 | 2.25E+08 | 1.81E+00 | 7.64E+09 |
| Median | - | - | - | 9.11E+13 | 2.83E+08 | **3.80E+00** | 8.99E+09 |
| Worst | - | - | - | 1.07E+14 | 3.32E+08 | 9.55E+00 | 1.11E+10 |
| Mean | - | - | - | 9.24E+13 | 2.80E+08 | **4.02E+00** | 9.22E+09 |
| Std | - | - | - | 9.48E+12 | 3.61E+07 | 2.15E+00 | 1.04E+09 |
| ANDE*CR*=0.5 | Best | - | - | - | 4.79E+12 | 3.16E+08 | 1.92E+01 | 7.83E+07 |
| Median | - | - | - | 1.24E+13 | 3.48E+08 | 1.94E+01 | 1.20E+08 |
| Worst | - | - | - | 4.50E+13 | 3.61E+08 | 1.98E+01 | 3.14E+08 |
| Mean | - | - | - | 1.46E+13 | 3.45E+08 | 1.94E+01 | 1.42E+08 |
| Std | - | - | - | 1.11E+13 | 1.35E+07 | 1.80E-01 | 6.63E+07 |
| ANDE*CR*=0.9 | Best | - | - | - | 2.46E+12 | 8.75E+07 | 1.95E+06 | 2.41E+06 |
| Median | - | - | - | 4.18E+12 | 1.28E+08 | 3.07E+06 | 4.75E+06 |
| Worst | - | - | - | 6.62E+12 | 1.78E+08 | 7.75E+06 | 1.07E+07 |
| Mean | - | - | - | 4.18E+12 | 1.29E+08 | 3.59E+06 | 5.50E+06 |
| Std | - | - | - | 1.27E+12 | 2.63E+07 | 1.73E+06 | 2.71E+06 |
| ANDE-OFL | Best | - | - | - | 2.38E+12 | 5.27E+07 | 1.94E+01 | 2.91E+06 |
| Median | - | - | - | 3.81E+12 | 9.15E+07 | 2.03E+01 | 5.82E+06 |
| Worst | - | - | - | 7.14E+12 | 1.15E+08 | 1.80E+06 | 1.72E+07 |
| Mean | - | - | - | 4.09E+12 | 8.73E+07 | 3.84E+05 | 7.21E+06 |
| Std | - | - | - | 1.11E+12 | 1.79E+07 | 5.96E+05 | 3.97E+06 |
|  |  | *F*8 | *F*9 | *F*10 | *F*11 | *F*12 | *F*13 | *F*14 |
| ANDE | Best | 4.19E+07 | 2.49E+08 | 3.35E+03 | 5.59E+01 | 4.76E+05 | 3.02E+03 | 8.44E+08 |
| Median | **4.50E+07** | **2.63E+08** | **3.77E+03** | 9.79E+01 | **4.87E+05** | 4.56E+03 | **9.32E+08** |
| Worst | 1.48E+08 | 3.24E+08 | 4.38E+03 | 1.46E+02 | 5.51E+05 | 1.67E+04 | 1.03E+09 |
| Mean | 7.02E+07 | **2.71E+08** | **3.83E+03** | 1.01E+02 | **4.82E+05** | 5.30E+03 | **9.33E+08** |
| Std | 3.31E+07 | 2.22E+07 | 2.60E+02 | 2.78E+01 | 3.33E+04 | 3.26E+03 | 4.91E+07 |
| ANDE*CR*=0.1 | Best | 4.47E+07 | 2.67E+08 | 1.12E+04 | 5.61E+00 | 5.82E+06 | 2.01E+03 | 8.06E+09 |
| Median | 4.72E+07 | 3.22E+08 | 1.14E+04 | **8.31E+00** | 6.43E+06 | **2.83E+03** | 1.06E+10 |
| Worst | 1.00E+08 | 3.98E+08 | 1.16E+04 | 1.50E+01 | 6.77E+06 | 8.39E+03 | 1.29E+10 |
| Mean | **5.83E+07** | 3.79E+09 | 1.14E+04 | **9.08E+00** | 6.41E+06 | **3.73E+03** | 1.05E+10 |
| Std | 2.12E+07 | 3.82E+07 | 1.34E+02 | 2.98E+00 | 2.55E+05 | 2.12E+03 | 1.52E+09 |
| ANDE*CR*=0.5 | Best | 4.36E+07 | 3.59E+08 | 4.59E+03 | 1.13E+02 | 4.61E+05 | 4.73E+05 | 1.04E+09 |
| Median | 9.82E+07 | 4.68E+08 | 4.70E+03 | 1.29E+02 | 5.75E+05 | 8.04E+05 | 1.18E+09 |
| Worst | 1.26E+08 | 9.61E+08 | 4.96E+03 | 1.48E+02 | 6.96E+05 | 6.70E+06 | 1.27E+09 |
| Mean | 9.14E+07 | 5.08E+08 | 4.76E+03 | 1.28E+02 | 5.71E+05 | 1.47E+06 | 1.19E+09 |
| Std | 2.48E+07 | 1.62E+08 | 1.28E+02 | 9.75E+00 | 5.93E+04 | 1.79E+06 | 6.86E+07 |
| ANDE*CR*=0.9 | Best | 7.75E+07 | 3.94E+09 | 8.89E+03 | 2.07E+02 | 9.16E+05 | 3.79E+09 | 3.87E+09 |
| Median | 9.35E+07 | 5.66E+09 | 9.34E+03 | 2.09E+02 | 1.01E+06 | 9.74E+09 | 4.46E+09 |
| Worst | 1.66E+08 | 1.04E+10 | 9.80E+03 | 2.14E+02 | 1.16E+06 | 2.58E+10 | 5.59E+09 |
| Mean | 1.13E+08 | 6.13E+09 | 9.28E+03 | 2.10E+02 | 1.02E+06 | 1.13E+10 | 4.57E+09 |
| Std | 3.21E+07 | 1.96E+09 | 2.82E+02 | 1.91E+00 | 7.71E+04 | 6.54E+09 | 4.96E+08 |
| ANDE-OFL | Best | 3.66E+07 | 4.04E+08 | 6.63E+03 | 1.46E+02 | 5.39E+05 | 7.91E+05 | 1.56E+09 |
| Median | 4.81E+07 | 2.63E+09 | 7.72E+03 | 1.79E+02 | 8.35E+05 | 9.47E+08 | 2.62E+09 |
| Worst | 2.79E+08 | 6.27E+09 | 8.95E+03 | 1.97E+02 | 1.25E+06 | 1.17E+10 | 4.49E+09 |
| Mean | 8.72E+07 | 2.88E+09 | 7.56E+03 | 1.76E+02 | 8.36E+05 | 2.49E+09 | 2.67E+09 |
| Std | 6.75E+07 | 2.03E+09 | 7.19e+02 | 1.39E+01 | 2.24E+05 | 3.40E+09 | 8.63E+08 |
|  |  | F15 | F16 | F17 | F18 | F19 | F20 |  |
| ANDE | Best | 4.18E+03 | 3.14E+02 | 9.29E+05 | 5.60E+04 | 3.49E+06 | 5.79E+04 |  |
| Median | **4.36E+03** | 3.59E+02 | 9.93E+05 | 193E+05 | 3.83E+06 | 1.20E+05 |  |
| Worst | 4.67E+03 | 3.82E+02 | 1.06E+06 | 3.42E+05 | 4.37E+06 | 3.89E+05 |  |
| Mean | **4.38E+03** | 3.58E+02 | 9.87E+05 | 1.93E+05 | 3.91E+06 | 1.45E+05 |  |
| Std | 1.38E+02 | 2.02E+01 | 4.20E+04 | 7.75E+04 | 2.40E+05 | 9.03E+04 |  |
| ANDE*CR*=0.1 | Best | 1.28E+04 | 8.21E+01 | 1.17E+07 | 4.77E+04 | 2.20E+07 | 2.21E+04 |  |
| Median | 1.33E+04 | **1.11E+02** | 1.22E+07 | **6.86E+04** | 2.47E+07 | **2.77E+04** |  |
| Worst | 1.34E+04 | 1.70E+02 | 1.28E+07 | 8.29E+04 | 2.75E+07 | 3.86E+04 |  |
| Mean | 1.32E+04 | **1.17E+02** | 1.22E+07 | **6.63E+04** | 2.49E+07 | **2.83E+04** |  |
| Std | 1.88E+02 | 2.66E+01 | 3.93E+05 | 1.30E+04 | 1.60E+06 | 5.23E+03 |  |
| ANDE*CR*=0.5 | Best | 5.55E+03 | 2.99E+02 | 8.98E+05 | 3.98E+09 | 1.46E+07 | 5.98E+09 |  |
| Median | 1.29E+04 | 3.32E+02 | 9.64E+05 | 8.09E+09 | 1.86E+07 | 1.05E+10 |  |
| Worst | 1.37E+04 | 3.50E+02 | 1.05E+06 | 1.36E+10 | 2.16E+07 | 1.86E+10 |  |
| Mean | 1.04E+04 | 3.27E+02 | 9.77E+05 | 7.96E+09 | 1.82E+07 | 1.07E+10 |  |
| Std | 3.46E+03 | 1.67E+02 | 4.75E+04 | 3.23E+09 | 2.07E+06 | 4.20E+09 |  |
| ANDE*CR*=0.9 | Best | 9.02E+03 | 3.90E+02 | 1.16E+06 | 2.02E+11 | 2.15E+06 | 2.24E+11 |  |
| Median | 9.26E+03 | 3.92E+02 | 1.27E+06 | 2.57E+11 | **2.44E+06** | 2.90E+11 |  |
| Worst | 9.72E+03 | 3.95E+02 | 1.34E+06 | 3.72E+11 | 2.83E+06 | 3.49E+11 |  |
| Mean | 9.30E+03 | 3.92E+02 | 1.27E+06 | 2.63E+11 | **2.44E+06** | 2.87E+11 |  |
| Std | 2.39E+02 | 1.67E+00 | 5.10E+04 | 4.48E+10 | 1.84E+05 | 3.90E+10 |  |
| ANDE-OFL | Best | 6.89E+03 | 3.43E+02 | 9.04E+05 | 2.83E+009 | 2.12E+06 | 9.17E+09 |  |
| Median | 8.40E+03 | 3.85E+02 | 1.03E+06 | 5.86E+010 | 3.37E+06 | 2.58E+10 |  |
| Worst | 9.99E+03 | 4.09E+02 | 1.30E+06 | 1.76E+011 | 3.81E+06 | 6.48E+10 |  |
| Mean | 8.36E+03 | 3.86E+02 | 1.08E+06 | 7.58E+010 | 3.17E+06 | 3.19E+10 |  |
| Std | 8.12E+02 | 1.60E+01 | 1.31E+05 | 5.53E+010 | 6.54E+05 | 2.45E+10 |  |

**Table S8** Experimental Comparisons between ANDE, ANDELP=5% ANDELP=20% algorithms, FES= 6.00E+05

|  |  | *F*1 | *F*2 | *F*3 | *F*4 | *F*5 | *F*6 | *F*7 |
| --- | --- | --- | --- | --- | --- | --- | --- | --- |
| ANDE | Best | - | - | - | 1.65E+12 | 6.36E+07 | 2.47E+00 | 8.41E+05 |
| Median | - | - | - | 2.54E+12 | 8.15E+07 | 4.79E+00 | **1.45E+06** |
| Worst | - | - | - | 3.16E+12 | 1.04E+08 | 6.38E+00 | 2.82E+06 |
| Mean | - | - | - | 2.44E+12 | 8.30E+07 | **4.39E+00** | 1.53E+06 |
| Std | - | - | - | 4.23E+11 | 1.29E+07 | 1.44E+00 | 2.82E+05 |
| ANDE*LP*=5% | Best | - | - | - | 1.02E+12 | 5.47E+07 | 2.44E+00 | 1.04E+06 |
| Median | - | - | - | **2.13E+12** | **6.96E+07** | **4.64E+00** | 1.61E+06 |
| Worst | - | - | - | 2.51E+12 | 1.01E+08 | 6.73E+00 | 2.02E+06 |
| Mean | - | - | - | **2.01E+12** | **7.27E+07** | 4.43E+00 | **1.51E+06** |
| Std | - | - | - | 4.58E+11 | 1.44E+07 | 1.65E+00 | 3.22E+05 |
| ANDE*LP*=20% | Best | - | - | - | 1.30E+12 | 5.47e+07 | 1.87E+01 | 1.09E+06 |
| Median | - | - | - | 2.43E+12 | 8.45e+07 | 1.94E+01 | 1.59E+06 |
| Worst | - | - | - | 3.78E+12 | 1.16e+08 | 1.97E+01 | 2.93E+06 |
| Mean | - | - | - | 2.40E+12 | 8.41E+07 | 1.93E+01 | 1.79E+06 |
| Std | - | - | - | 8.14E+11 | 1.93e+07 | 2.58E-01 | 6.21E+06 |
|  |  | *F*8 | *F*9 | *F*10 | *F*11 | *F*12 | *F*13 | *F*14 |
| ANDE | Best | 4.19E+07 | 2.49E+08 | 3.35E+03 | 5.59E+01 | 4.45E+05 | 3.02E+03 | 8.44E+08 |
| Median | **4.50E+07** | 2.63E+08 | 3.77E+03 | **9.79E+01** | 4.87E+05 | **4.56E+03** | 9.32E+08 |
| Worst | 1.48E+08 | 3.24E+08 | 4.38E+03 | 1.46E+02 | 5.51E+05 | 1.67E+04 | 1.03E+09 |
| Mean | **7.02E+07** | **2.71E+08** | 3.83E+03 | **1.01E+02** | **4.76E+05** | **5.30E+03** | **9.33E+08** |
| Std | 3.31E+07 | 2.22E+07 | 2.60E+02 | 2.78E+01 | 3.33E+04 | 3.26E+03 | 4.91E+07 |
| ANDE*LP*=5% | Best | 3.22E+07 | 2.46E+08 | 3.92E+03 | 7.42E+01 | 4.53E+05 | 3.43E+03 | **8.77E+08** |
| Median | 8.98E+07 | 2.83E+08 | 4.18E+03 | 1.16E+02 | **4.85E+05** | 5.16E+03 | 9.21E+08 |
| Worst | 1.45E+08 | 3.21E+08 | 4.32E+03 | 1.60E+02 | 5.42E+05 | 8.89E+03 | 1.02E+09 |
| Mean | 8.19E+07 | 2.83E+08 | 4.17E+03 | 1.17E+02 | 4.89E+05 | 5.75E+03 | 9.36E+08 |
| Std | 3.24E+07 | 2.39E+07 | 1.10E+02 | 2.79E+01 | 2.71E+04 | 1.65E+03 | 4.53E+07 |
| ANDE*LP*=20% | Best | 4.13E+07 | 2.74E+08 | 2.86E+03 | 1.15E+02 | 5.95E+05 | 3.61E+03 | 8.33E+08 |
| Median | 9.73E+07 | **2.40E+08** | **3.03E+03** | 1.47E+02 | 5.16E+05 | 9.40E+03 | 9.65E+08 |
| Worst | 1.10E+08 | 3.12E+08 | 3.32E+03 | 1.68E+02 | 5.65E+05 | 3.64E+04 | 1.01E+09 |
| Mean | 7.50E+07 | 2.77E+08 | **3.09E+03** | 1.45E+02 | 5.10E+05 | 1.11E+04 | 9.47E+08 |
| Std | 3.14E+07 | 2.27E+07 | 1.38E+02 | 1.39E+01 | 5.04E+04 | 8.98E+03 | 5.22E+09 |
|  |  | *F*15 | *F*16 | *F*17 | *F*18 | *F*19 | *F*20 |  |
| ANDE | Best | 4.18E+03 | 3.14E+02 | 9.29E+05 | 5.60E+04 | 3.49E+06 | 5.79E+04 |  |
| Median | 4.36E+03 | 3.59E+02 | 9.93E+05 | 1.93E+05 | **3.83E+06** | **1.20E+05** |  |
| Worst | 4.67E+03 | 3.82E+02 | 1.06E+06 | 3.42E+05 | 4.37E+06 | 3.89E+05 |  |
| Mean | 4.38E+03 | 3.58E+02 | **9.87E+05** | 1.93E+05 | **3.91E+06** | **1.45E+05** |  |
| Std | 1.38E+02 | 2.02E+01 | 4.20E+04 | 7.75E+04 | 2.40E+05 | 9.03E+04 |  |
| ANDE*LP*=5% | Best | 4.57E+03 | 3.29E+02 | 9.44E+05 | 5.72E+04 | 3.56E+06 | 2.41E+04 |  |
| Median | 5.12E+03 | 3.66E+02 | **9.70E+05** | **1.51E+05** | 3.96E+06 | 2.31E+05 |  |
| Worst | 5.24E+03 | 3.89E+02 | 1.10E+06 | 3.44E+05 | 4.60E+06 | 5.00E+05 |  |
| Mean | 5.02E+03 | 3.62E+02 | 9.95E+05 | **1.80E+05** | 3.96E+06 | 2.05E+05 |  |
| Std | 2.27E+02 | 2.11E+02 | 5.38E+04 | 7.93E+04 | 2.97E+05 | 1.36E+05 |  |
| ANDE*LP*=20% | Best | 3.45E+03 | 3.11E+02 | 8.89E+05 | 9.12E+04 | 3.73E+06 | 6.54E+04 |  |
| Median | **3.87E+03** | **3.53E+02** | 9.86E+05 | 3.58E+05 | 4.22E+06 | 4.72E+05 |  |
| Worst | 4.10E+03 | 3.74E+02 | 1.11E+06 | 5.48E+04 | 4.64E+06 | 1.49E+06 |  |
| Mean | **3.82E+03** | **3.44E+02** | 1.01E+06 | 1.56E+06 | 4.17E+06 | 5.62E+05 |  |
| Std | 2.03E+02 | 2.07E+02 | 6.73E+05 | 2.21E+06 | 3.01E+05 | 3.97E+05 |  |

**Table S9** Experimental Comparisons between ANDE, ANDEMFC=0 , ANDEMFC=10 and ANDEMFC=30 algorithms, FES= 6.0E5

|  |  | *F*1 | *F*2 | *F*3 | *F*4 | *F*5 | *F*6 | *F*7 |
| --- | --- | --- | --- | --- | --- | --- | --- | --- |
| ANDE | Best | - | - | - | 1.65E+12 | 6.36E+07 | 2.47E+00 | 8.41E+05 |
| Median | - | - | - | **2.54E+12** | 8.15E+07 | 4.79E+00 | 1.45E+06 |
| Worst | - | - | - | 3.16E+12 | 1.04E+08 | 6.38E+00 | 2.82E+06 |
| Mean | - | - | - | **2.44E+12** | 8.20E+07 | 4.39E+00 | 1.53E+06 |
| Std | - | - | - | 4.23E+11 | 1.29E+07 | 1.44E+00 | 2.82E+05 |
| ANDE*MFC*=0 | Best | - | - | - | 1.28E+12 | 4.88E+07 | 1.93E+01 | 1.00E+06 |
| Median | - | - | - | 2.36E+12 | 8.06E+07 | 1.96E+01 | 1.42E+06 |
| Worst | - | - | - | 3.84E+12 | 1.04E+08 | 1.98E+01 | 2.85E+06 |
| Mean | - | - | - | 2.52E+12 | 7.93E+07 | 1.96E+01 | 1.55E+06 |
| Std | - | - | - | 7.33E+11 | 1.89E+07 | 1.45E-01 | 2.97E+05 |
| ANDE*MFC*=10 | Best | - | - | - | 1.30E+12 | 5.77E+07 | 5.73E+00 | 8.09E+05 |
| Median | - | - | - | 2.61E+12 | 7.66E+07 | 1.08E+01 | **1.09E+06** |
| Worst | - | - | - | 3.34E+12 | 1.30E+08 | 1.18E+01 | 1.53E+06 |
| Mean | - | - | - | 2.45E+12 | 8.30E+07 | 9.37E+00 | **1.12E+06** |
| Std | - | - | - | 6.51E+11 | 2.07E+07 | 2.30E+00 | 1.95E+05 |
| ANDE*MFC*=30 | Best | - | - | - | 1.20E+12 | 5.07E+07 | 1.74E+00 | 1.45E+06 |
| Median | - | - | - | 3.19E+12 | **7.16E+07** | **3.74E+00** | 1.88E+06 |
| Worst | - | - | - | 4.35E+12 | 9.65E+07 | 5.43E+00 | 2.84E+06 |
| Mean | - | - | - | 3.00E+12 | **7.15E+07** | **3.31E+00** | 2.00E+06 |
| Std | - | - | - | 9.52E+11 | 1.11E+07 | 1.51E+00 | 4.56E+05 |
|  |  | *F*8 | *F*9 | *F*10 | *F*11 | *F*12 | *F*13 | *F*14 |
| ANDE | Best | 4.19E+07 | 2.49E+08 | 3.35E+03 | 5.59E+01 | 4.76E+05 | 3.02E+03 | 8.44E+08 |
| Median | 4.50E+07 | 2.63E+08 | 3.57E+03 | **9.79E+01** | 4.87E+05 | 4.56E+03 | 9.32E+08 |
| Worst | 1.48E+08 | 3.24E+08 | 3.83E+03 | 1.46E+02 | 5.51E+05 | 1.67E+04 | 1.03E+09 |
| Mean | **7.02E+07** | **2.71E+08** | **3.55E+03** | **1.01E+02** | 4.82E+05 | 5.30E+03 | 9.33E+08 |
| Std | 3.31E+07 | 2.22E+07 | 1.41E+02 | 2.78E+01 | 3.33E+04 | 3.26E+03 | 4.91E+07 |
| ANDE*MFC*=0 | Best | 4.14E+07 | 3.38E+08 | 3.58E+03 | 1.46E+02 | 4.43E+05 | 2.29E+05 | 1.01E+09 |
| Median | 4.65E+07 | 4.13E+08 | 3.86E+03 | 1.63E+02 | 5.13E+05 | 4.18E+05 | 1.13E+09 |
| Worst | 1.28E+08 | 5.47E+08 | 4.07E+03 | 1.72E+02 | 5.60E+05 | 7.37E+06 | 1.30E+09 |
| Mean | 6.32E+07 | 4.12E+08 | 3.84E+03 | 1.62E+02 | 4.99E+05 | 9.29E+05 | 1.13E+09 |
| Std | 2.88E+07 | 5.38E+07 | 1.35E+02 | 7.10E+00 | 3.60E+04 | 1.80E+06 | 8.96E+07 |
| ANDE*MFC*=10 | Best | 4.14E+07 | 2.58E+08 | 3.40E+03 | 1.32E+02 | 4.02E+05 | 4.45E+03 | 8.26E+08 |
| Median | 9.76E+07 | **2.82E+08** | 3.56E+03 | 1.50E+02 | **4.61E+05** | 9.56E+03 | **9.15E+08** |
| Worst | 1.05E+08 | 3.08E+08 | 3.84E+03 | 1.67E+02 | 5.37E+05 | 2.76E+04 | 9.83E+08 |
| Mean | 7.73E+07 | 2.83E+08 | 3.57E+03 | 1.48E+02 | **4.65E+05** | 1.08E+04 | **9.13E+08** |
| Std | 2.83E+07 | 1.63E+07 | 1.49E+02 | 1.03E+01 | 3.51E+04 | 6.80E+03 | 4.82E+07 |
| ANDE*MFC*=30 | Best | 3.80E+07 | 2.58E+08 | 3.34E+03 | 9.73E+01 | 4.42E+05 | 2.95E+03 | 8.98E+08 |
| Median | **4.32E+07** | 2.94E+08 | **3.55E+03** | 1.16E+02 | 5.11E+05 | **4.43E+03** | 9.69E+08 |
| Worst | 1.15E+08 | 3.36E+08 | 3.97E+03 | 1.64E+02 | 5.88E+05 | 1.16E+04 | 1.09E+09 |
| Mean | 7.13E+07 | 2.95E+08 | **3.55E+03** | 1.22E+02 | 5.20E+05 | **5.25E+03** | 9.87E+08 |
| Std | 3.46E+07 | 2.39E+07 | 1.27E+02 | 2.26E+01 | 4.39E+04 | 2.58E+03 | 6.07E+07 |
|  |  | *F*15 | *F*16 | *F*17 | *F*18 | *F*19 | *F*20 |  |
| ANDE | Best | 4.18E+03 | 3.14E+02 | 9.29E+05 | 5.60E+04 | 3.49E+06 | 5.79E+04 |  |
| Median | **4.36E+03** | 3.59E+02 | 9.93E+05 | 1.93E+05 | 3.83E+06 | **1.20E+05** |  |
| Worst | 4.67E+03 | 3.82E+02 | 1.06E+06 | 3.42E+05 | 4.37E+06 | 3.89E+05 |  |
| Mean | **4.38E+03** | 3.58E+02 | 9.87E+05 | 1.93E+05 | 3.91E+06 | **1.45E+05** |  |
| Std | 1.38E+02 | 2.02E+01 | 4.20E+04 | 7.75E+04 | 2.40E+05 | 9.03E+04 |  |
| ANDE*MFC*=0 | Best | 4.39E+03 | 3.40E+02 | 8.25E+05 | 2.43E+08 | 6.14E+08 | 3.61E+08 |  |
| Median | 4.69E+03 | 3.49E+02 | **9.08E+05** | 6.31E+08 | 1.45E+09 | 1.27E+09 |  |
| Worst | 5.05E+03 | 3.74E+02 | 9.63E+05 | 2.22E+09 | 2.37E+09 | 3.39E+09 |  |
| Mean | 4.67E+03 | 3.52E+02 | **9.05E+05** | 8.80E+08 | 1.53E+09 | 1.32E+09 |  |
| Std | 2.09E+02 | 8.71E+00 | 3.89E+04 | 6.02E+08 | 5.96E+08 | 7.39E+08 |  |
| ANDE*MFC*=10 | Best | 4.30E+03 | 3.32E+02 | 8.71E+05 | 1.45E+05 | 3.20E+06 | 1.37E+05 |  |
| Median | 4.53E+03 | **3.53E+02** | 9.45E+05 | 6.78E+05 | **3.46E+06** | 6.71E+05 |  |
| Worst | 4.69E+03 | 3.79E+02 | 1.01E+06 | 1.68E+06 | 3.99E+06 | 2.07E+06 |  |
| Mean | 4.51E+03 | **3.56E+02** | 9.47E+05 | 7.13E+05 | **3.56E+06** | 7.59E+05 |  |
| Std | 1.40E+02 | 1.51E+01 | 4.55E+04 | 4.57E+05 | 2.62E+05 | 5.85E+05 |  |
| ANDE*MFC*=30 | Best | 4.10E+03 | 3.20E+02 | 9.65E+05 | 1.14E+05 | 4.26E+06 | 3.01E+04 |  |
| Median | 4.50E+03 | 3.65E+02 | 1.07E+06 | **1.57E+05** | 4.50E+06 | 1.58E+05 |  |
| Worst | 4.84E+03 | 3.83E+02 | 1.11E+06 | 2.23E+05 | 4.92E+06 | 4.80E+05 |  |
| Mean | 4.45E+03 | 3.62E+02 | 1.06E+06 | **1.59E+05** | 4.55E+06 | 1.98E+05 |  |
| Std | 2.01E+02 | 2.29E+01 | 4.27E+04 | 2.86E+04 | 2.32E+06 | 1.33E+05 |  |

**Fig. S1**.Convergence graph (median curves) of ANDE, ANDE-1, ANDE-2 on 1000-dimensional test functions.

**Fig. S2 .**Convergence graph (median curves) of ANDE, ANDE-1, ANDE-2 on test functionF6
